# Supplementary material
Source: publisher figshare collection journal article supplement (https://gsajournals.figshare.com/articles/dataset/_/9994643)

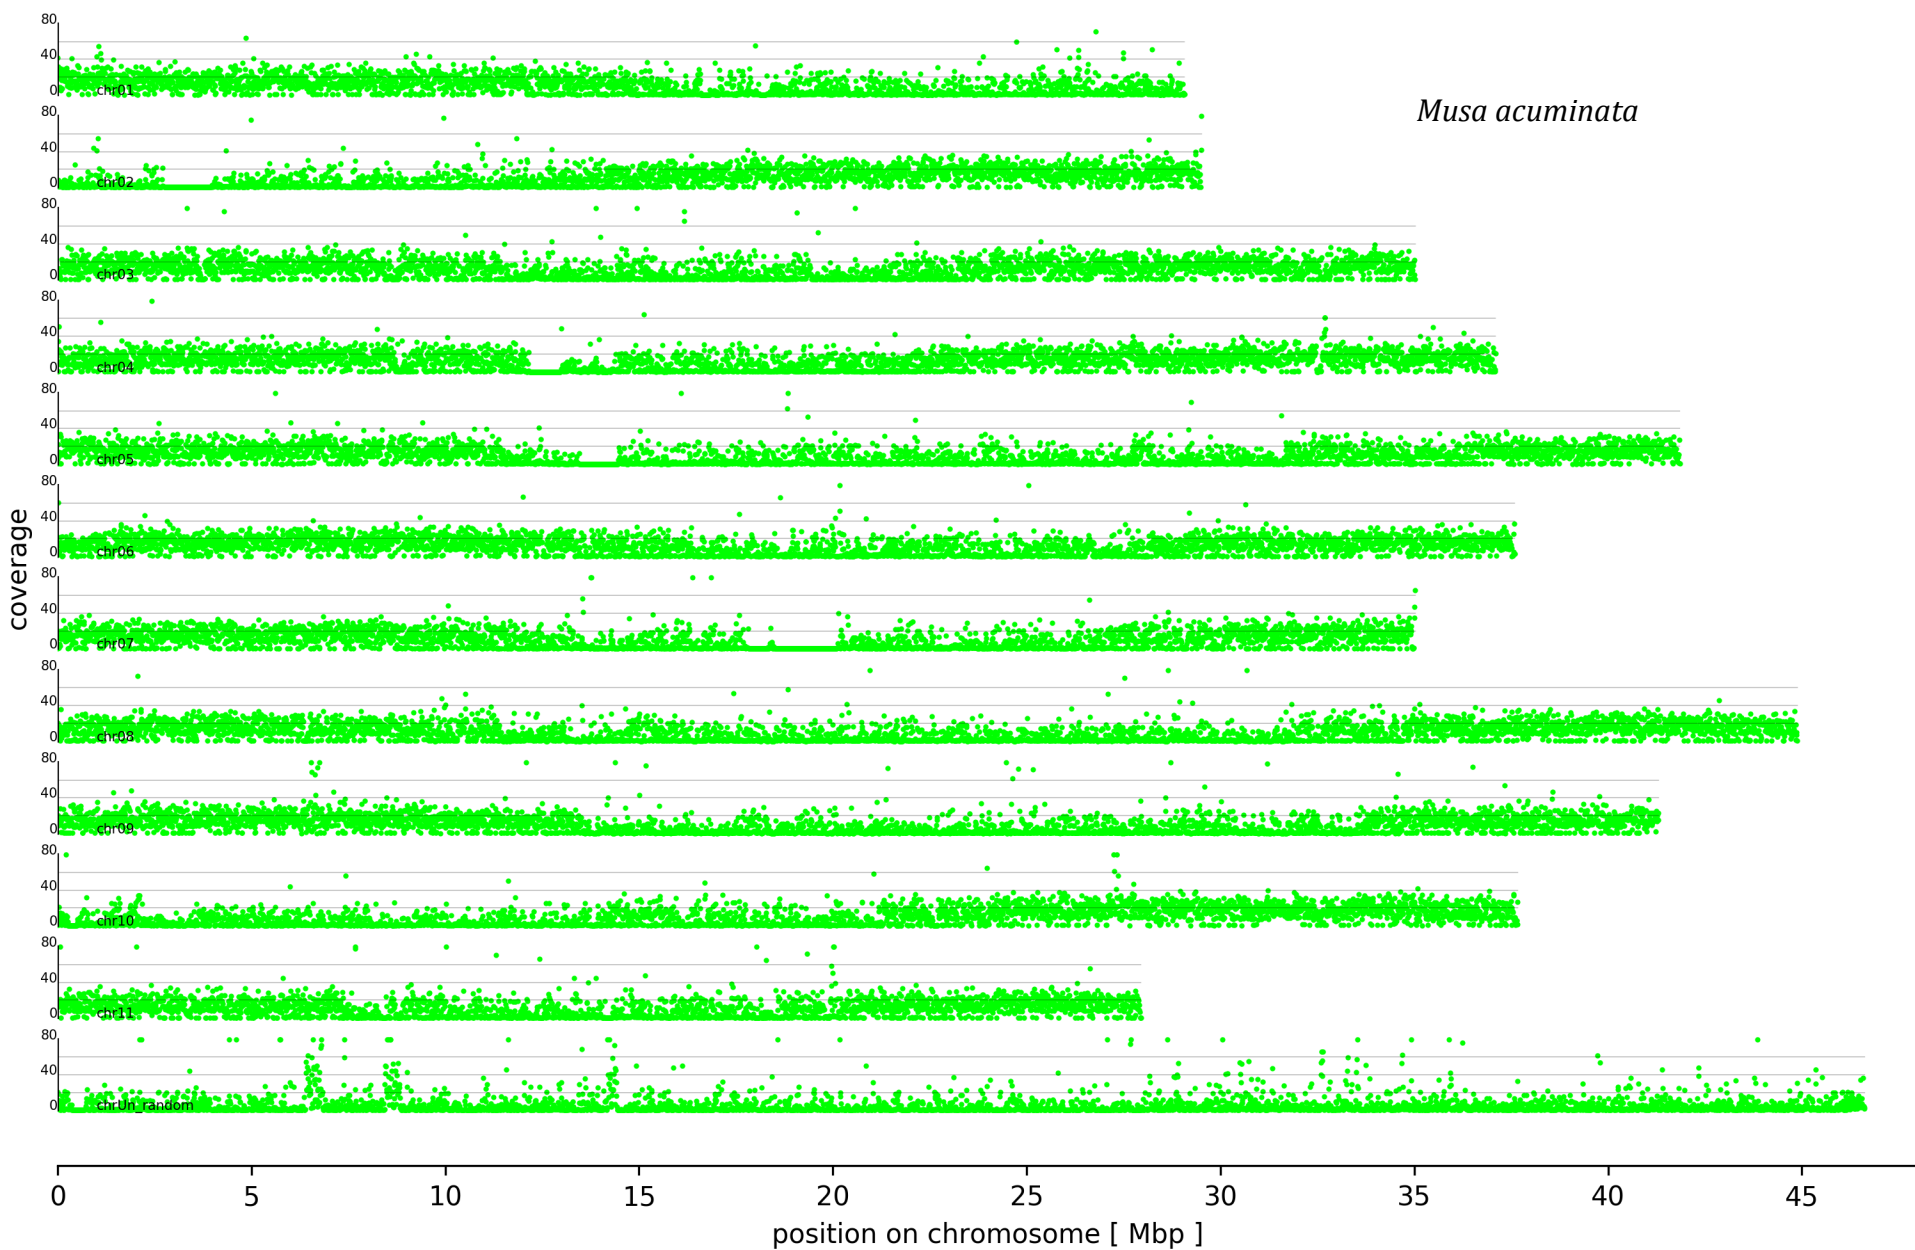

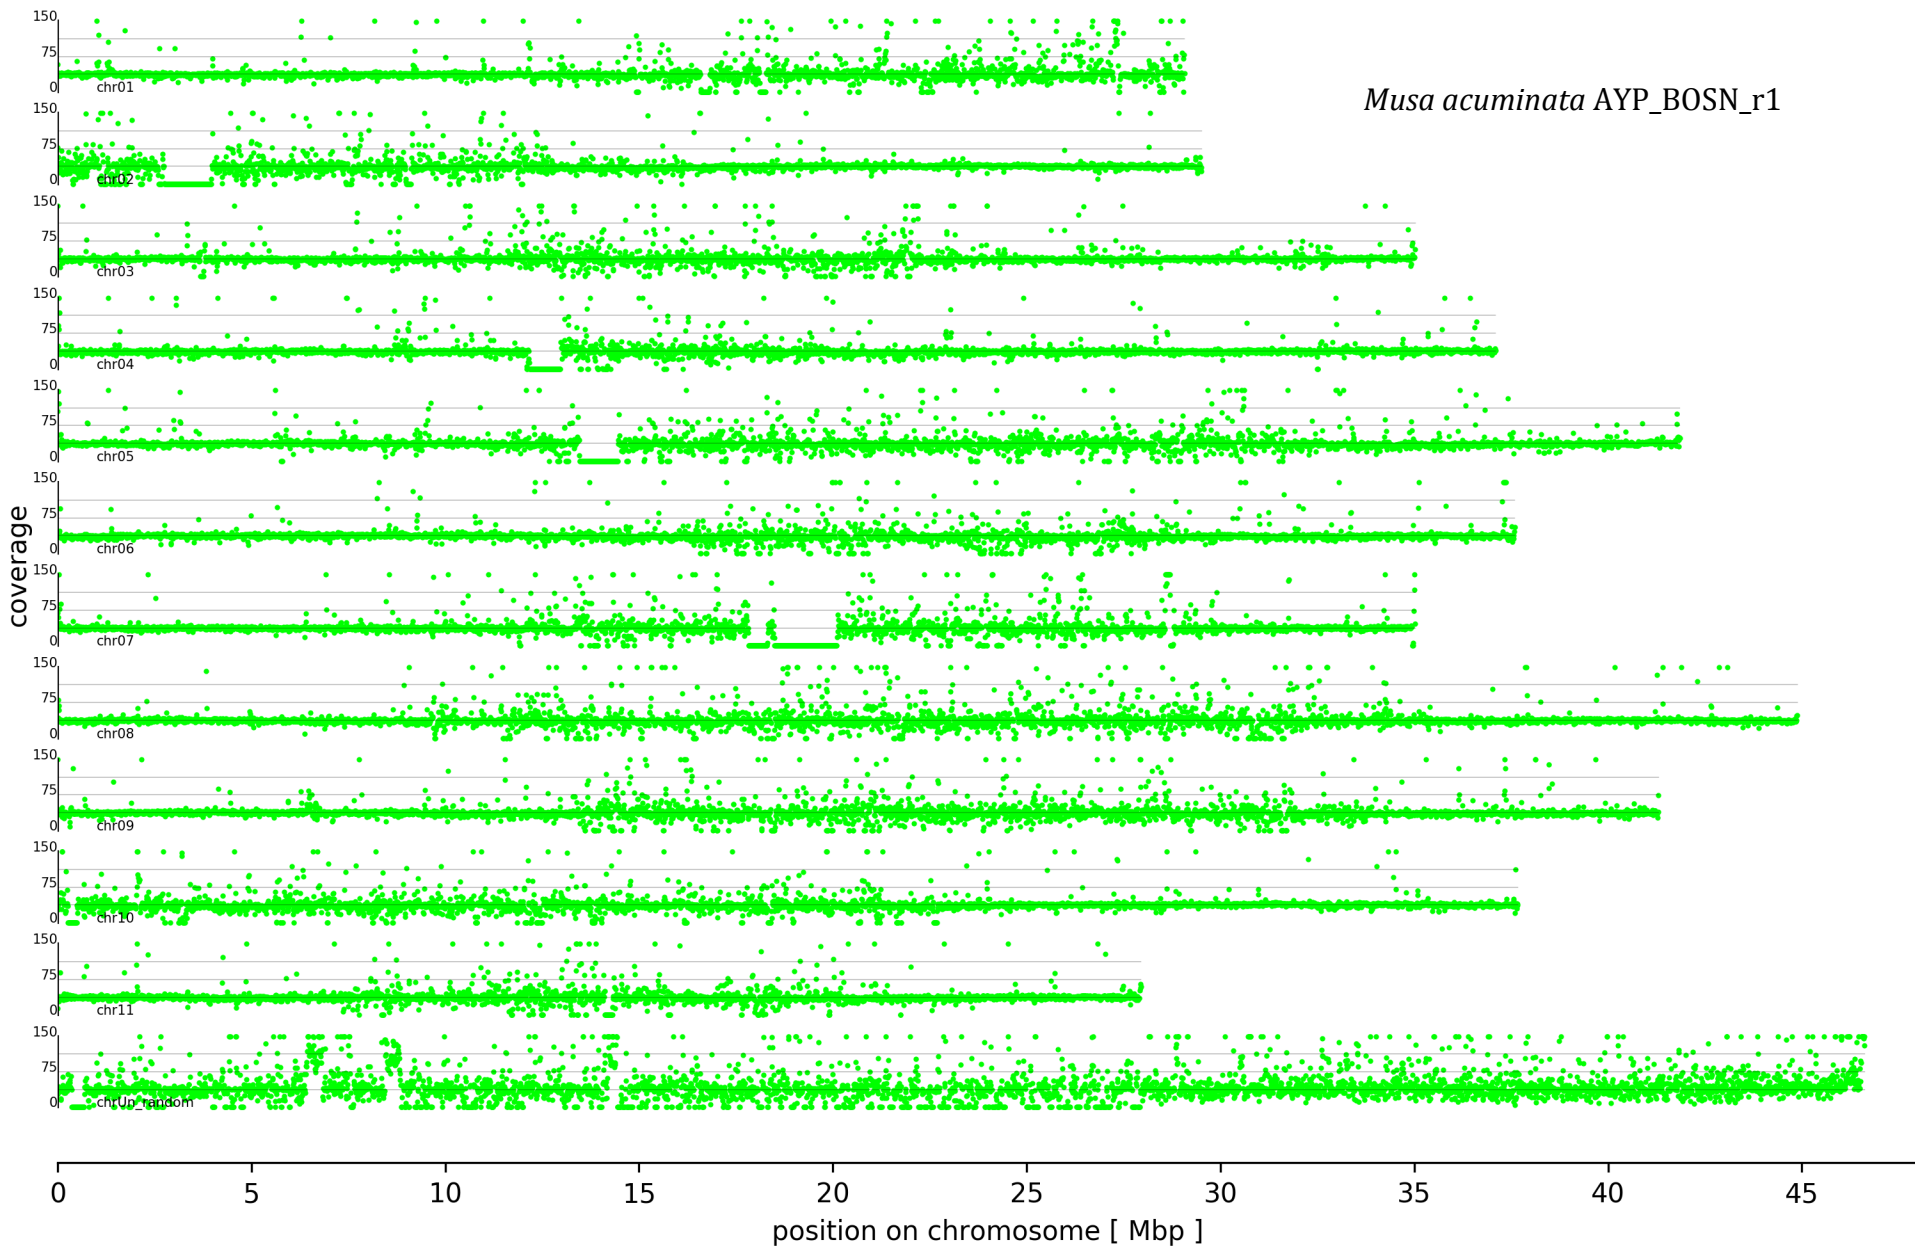

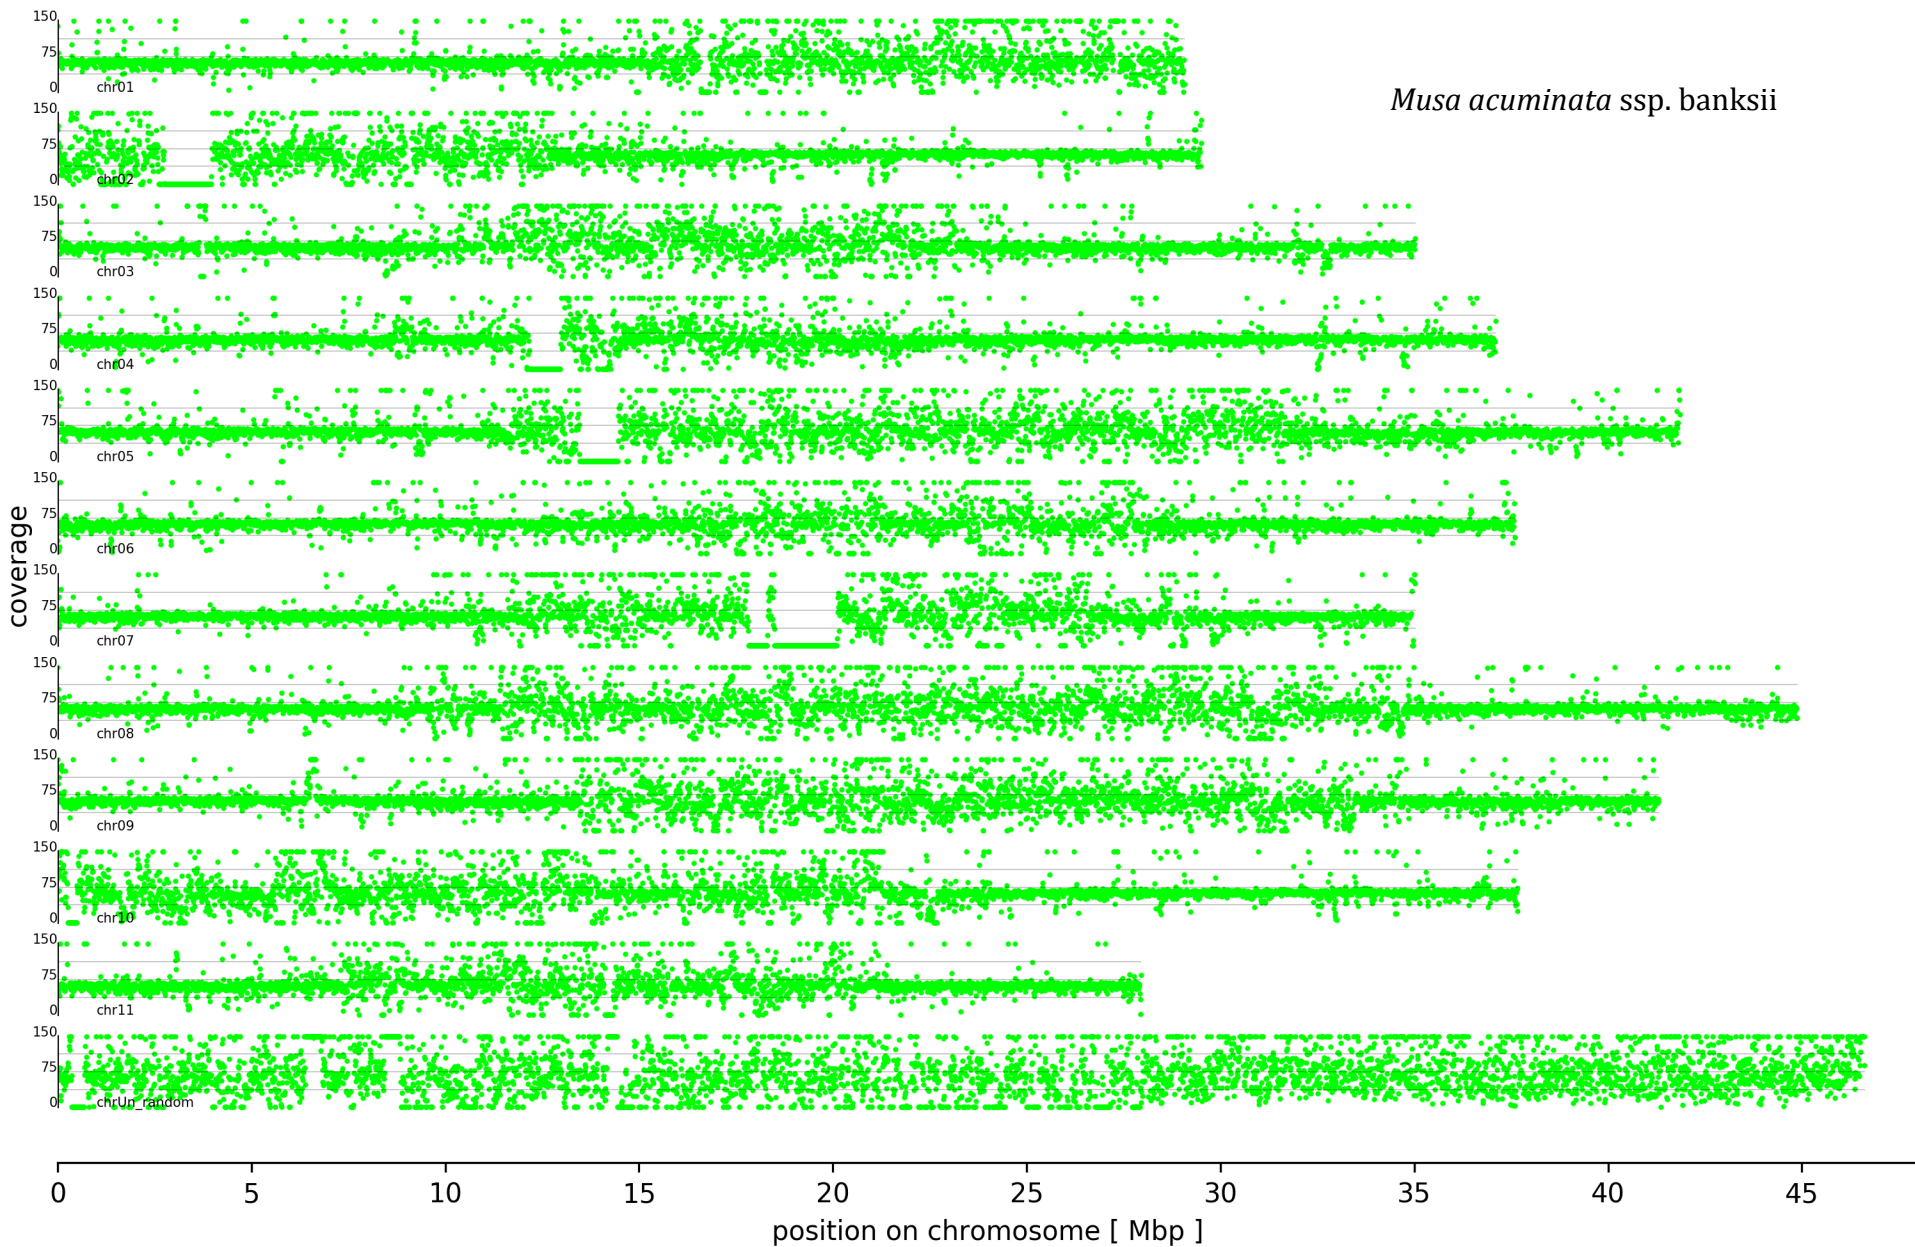

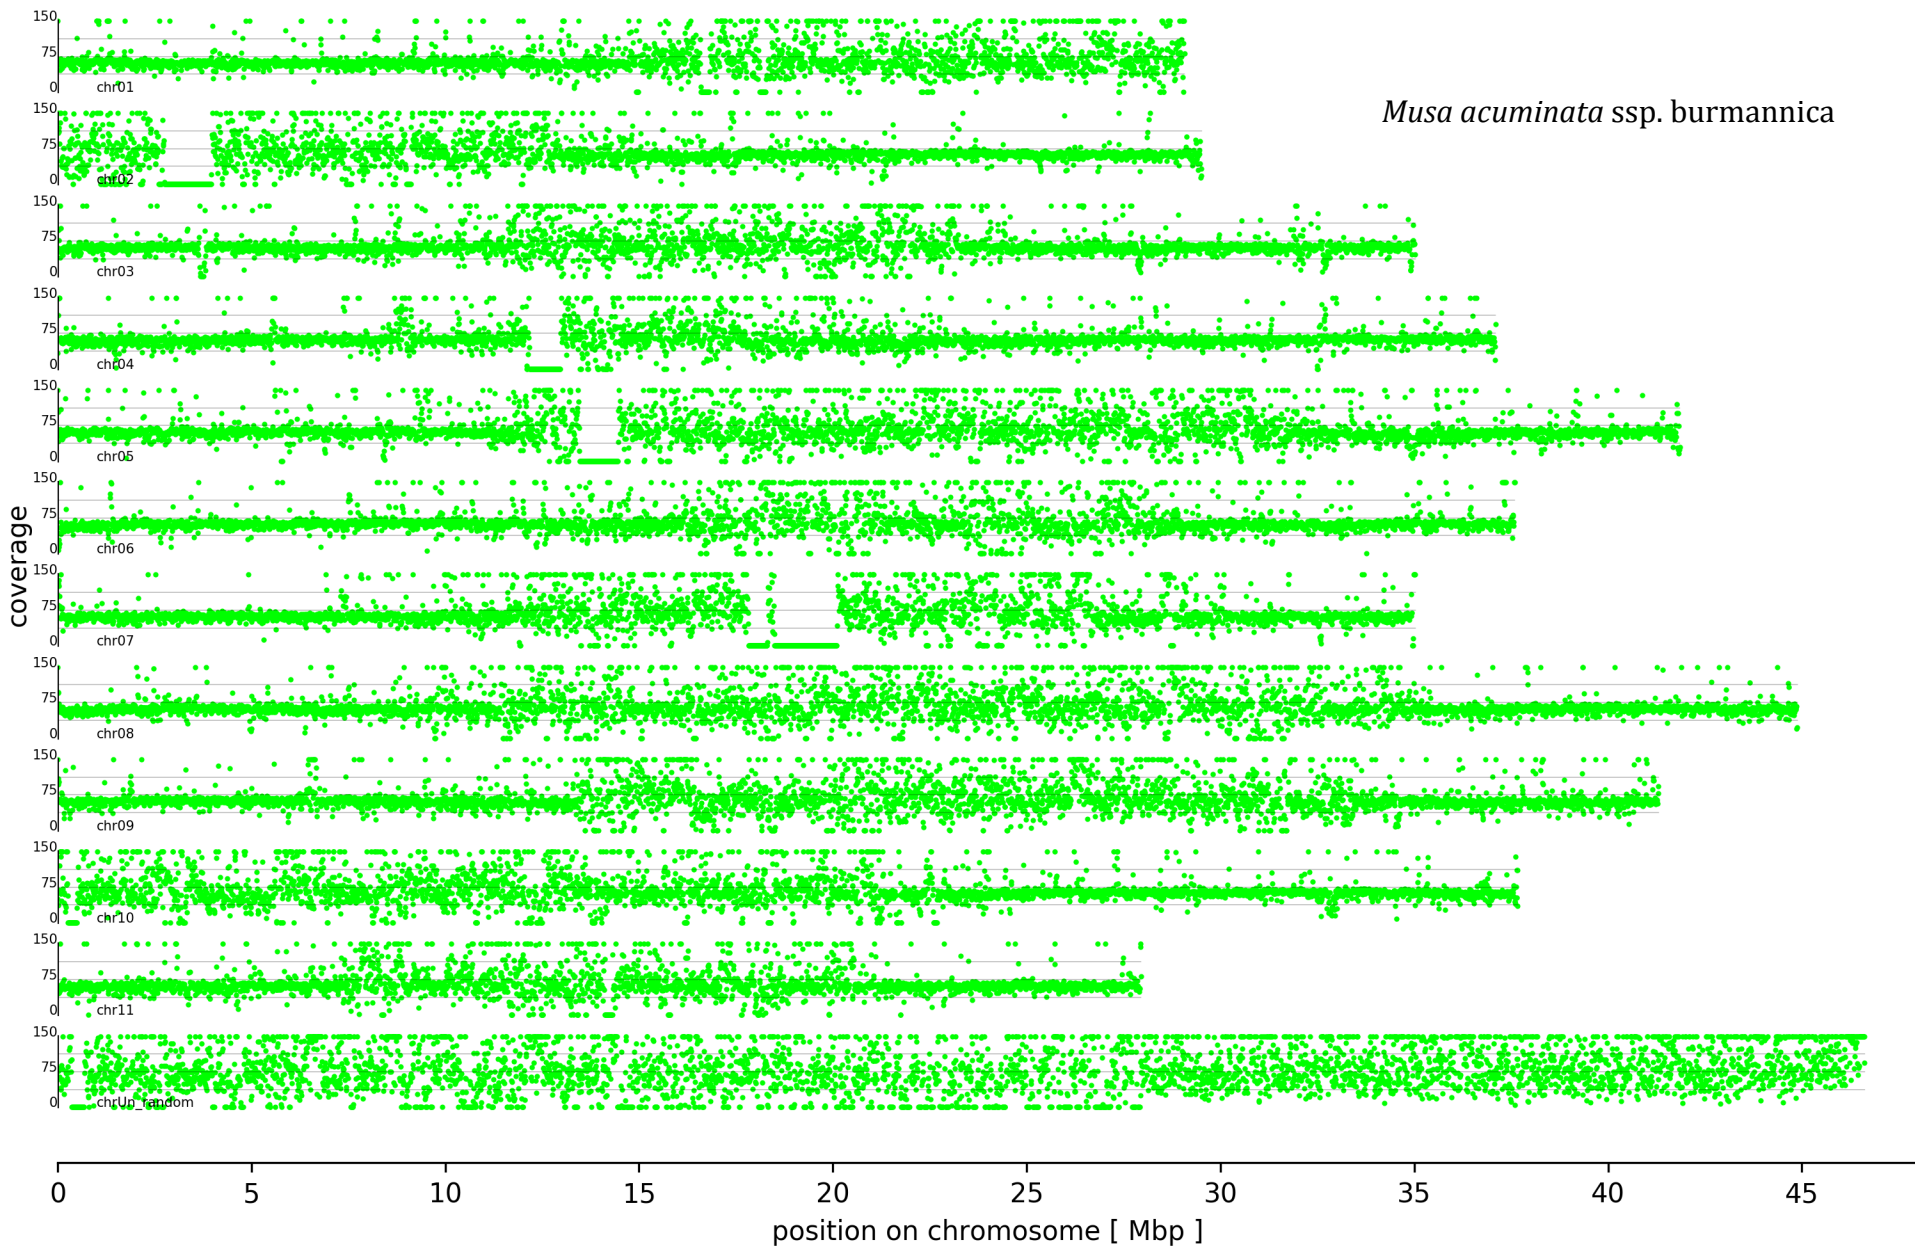

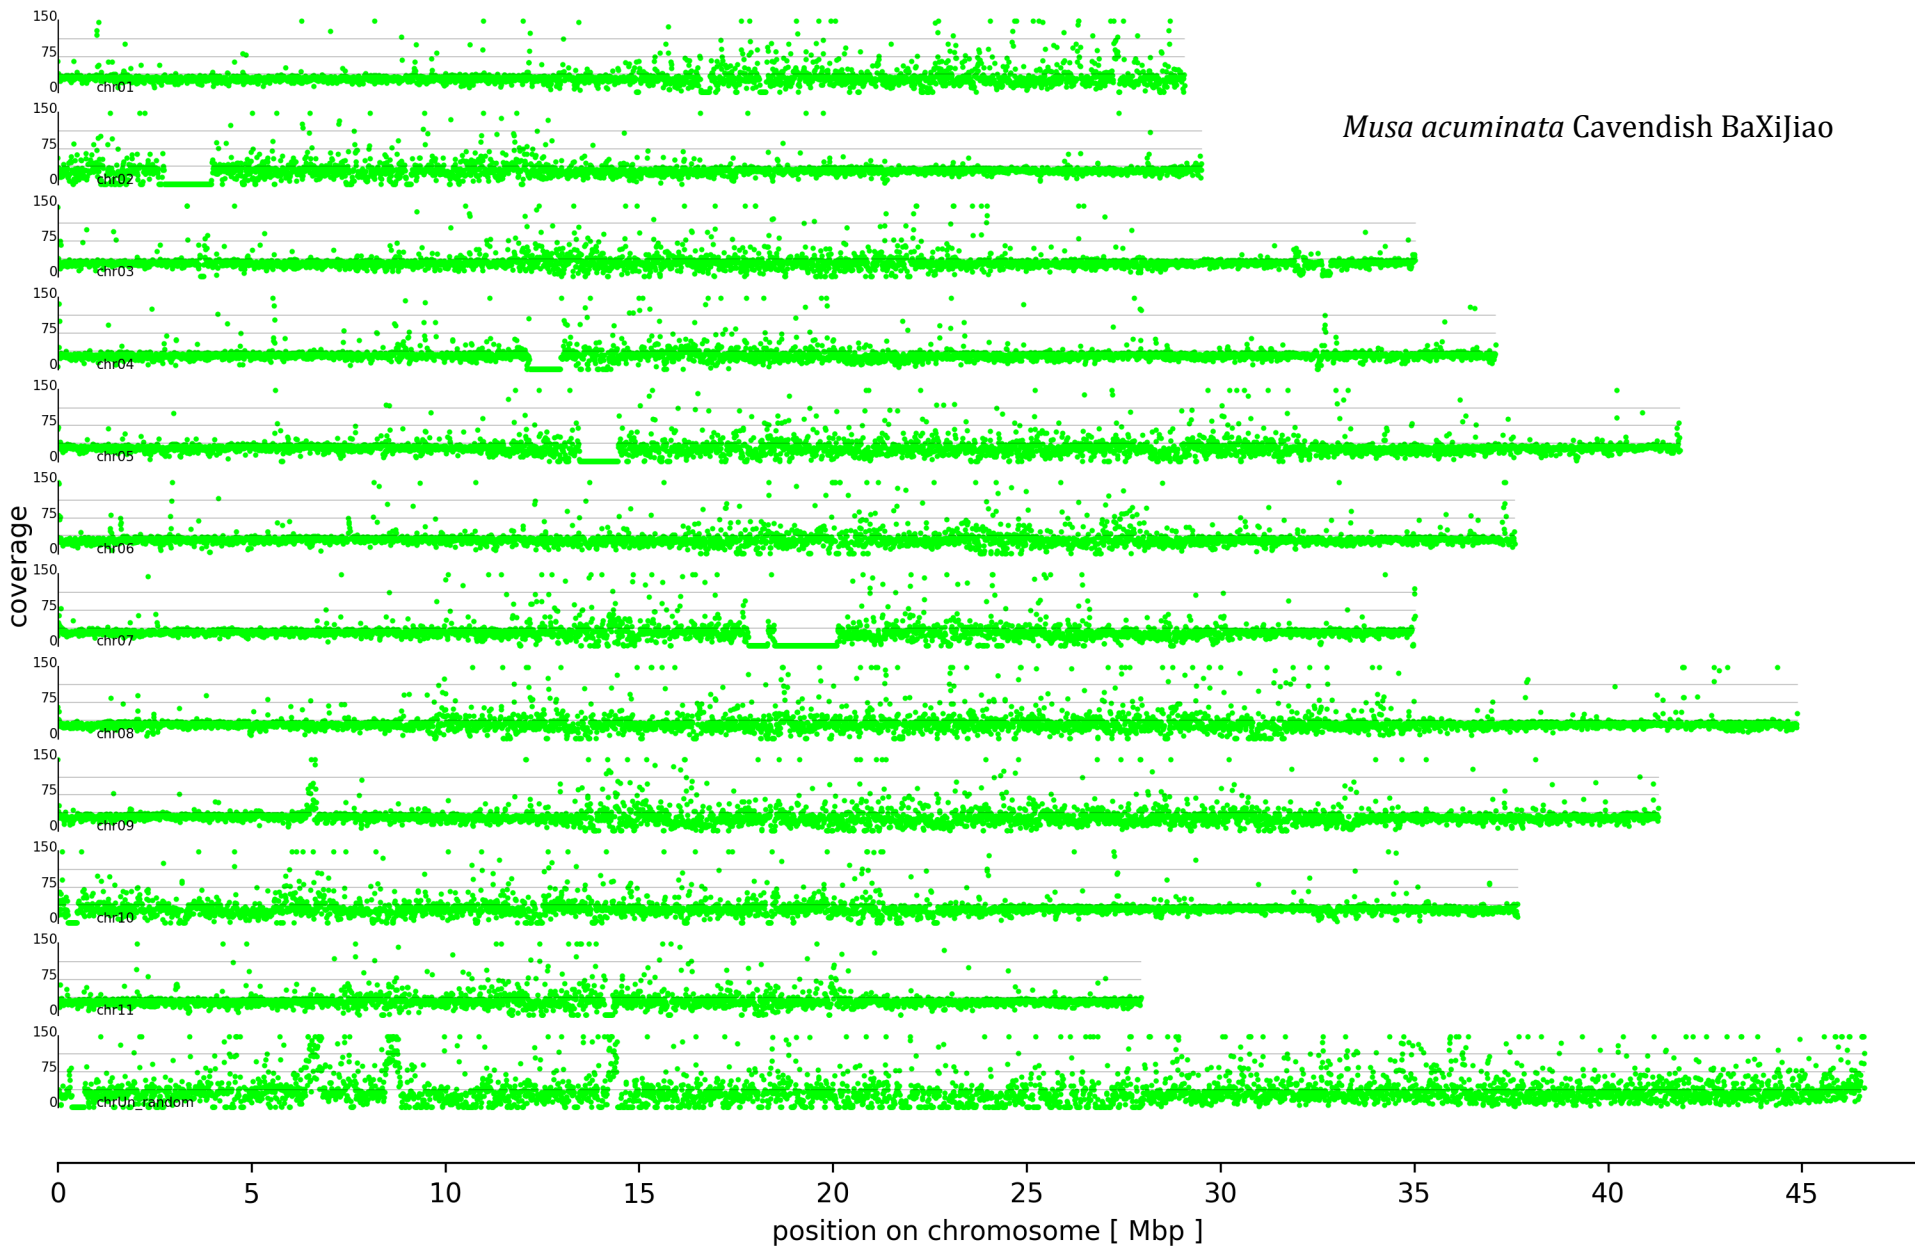

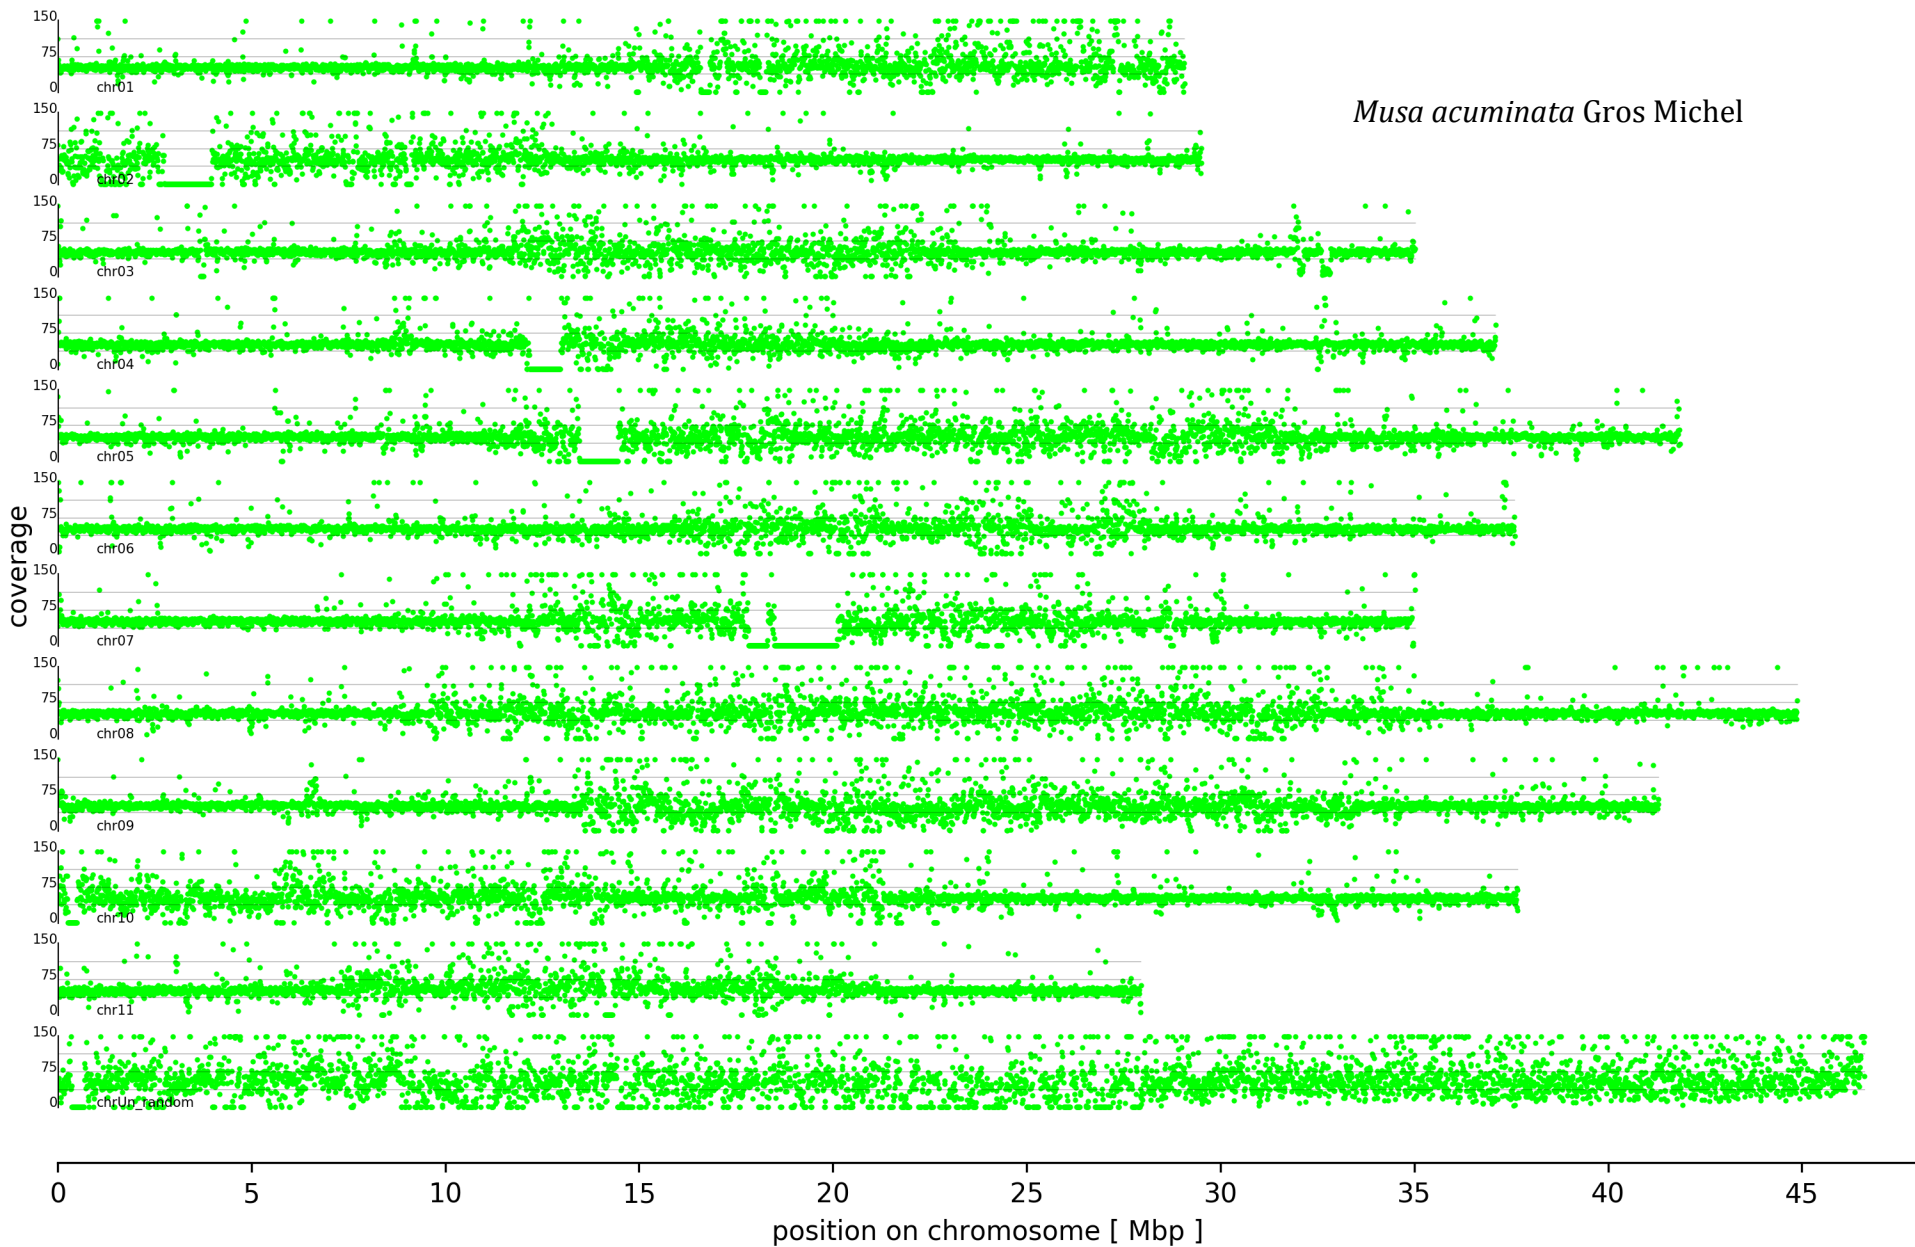

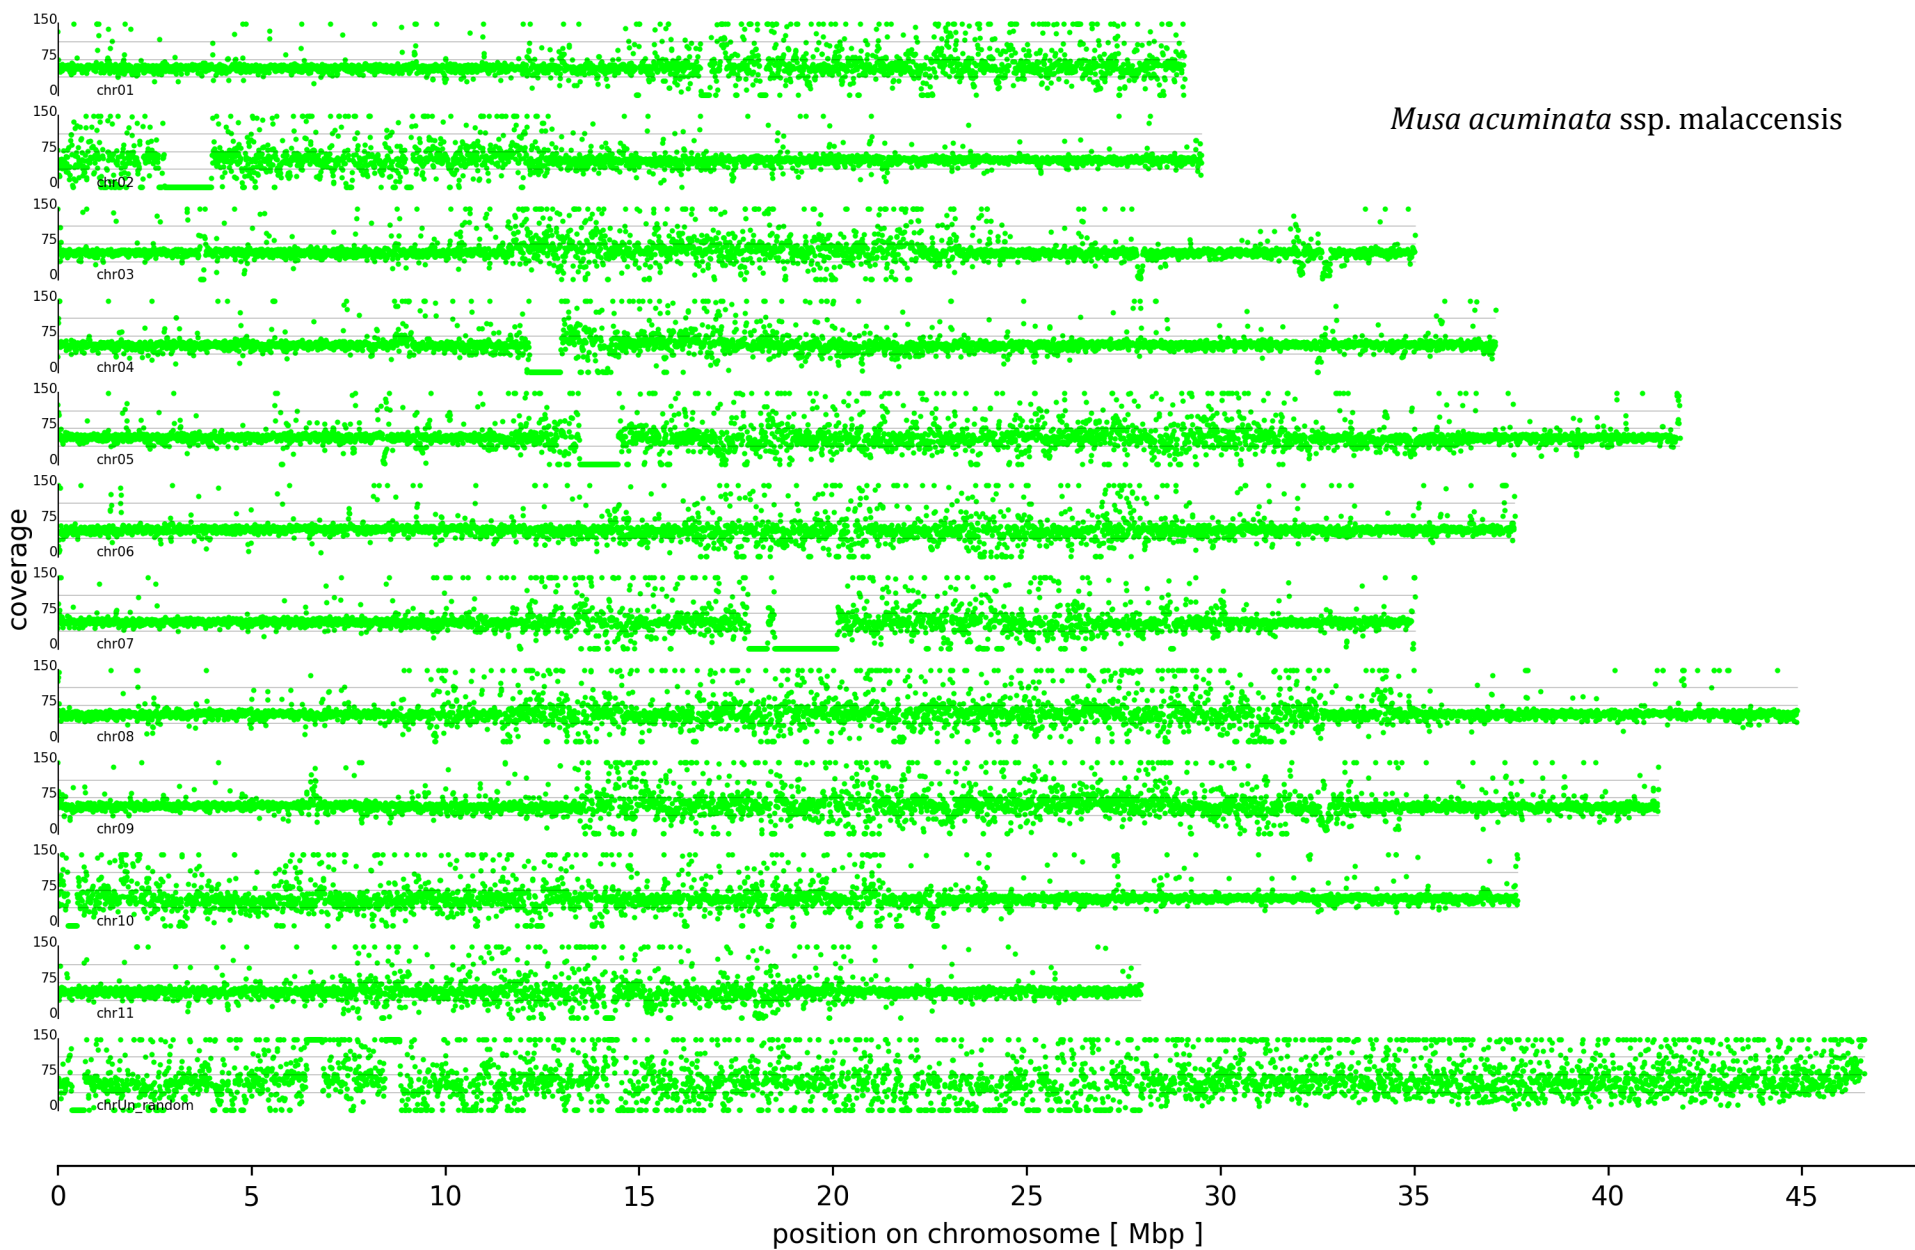

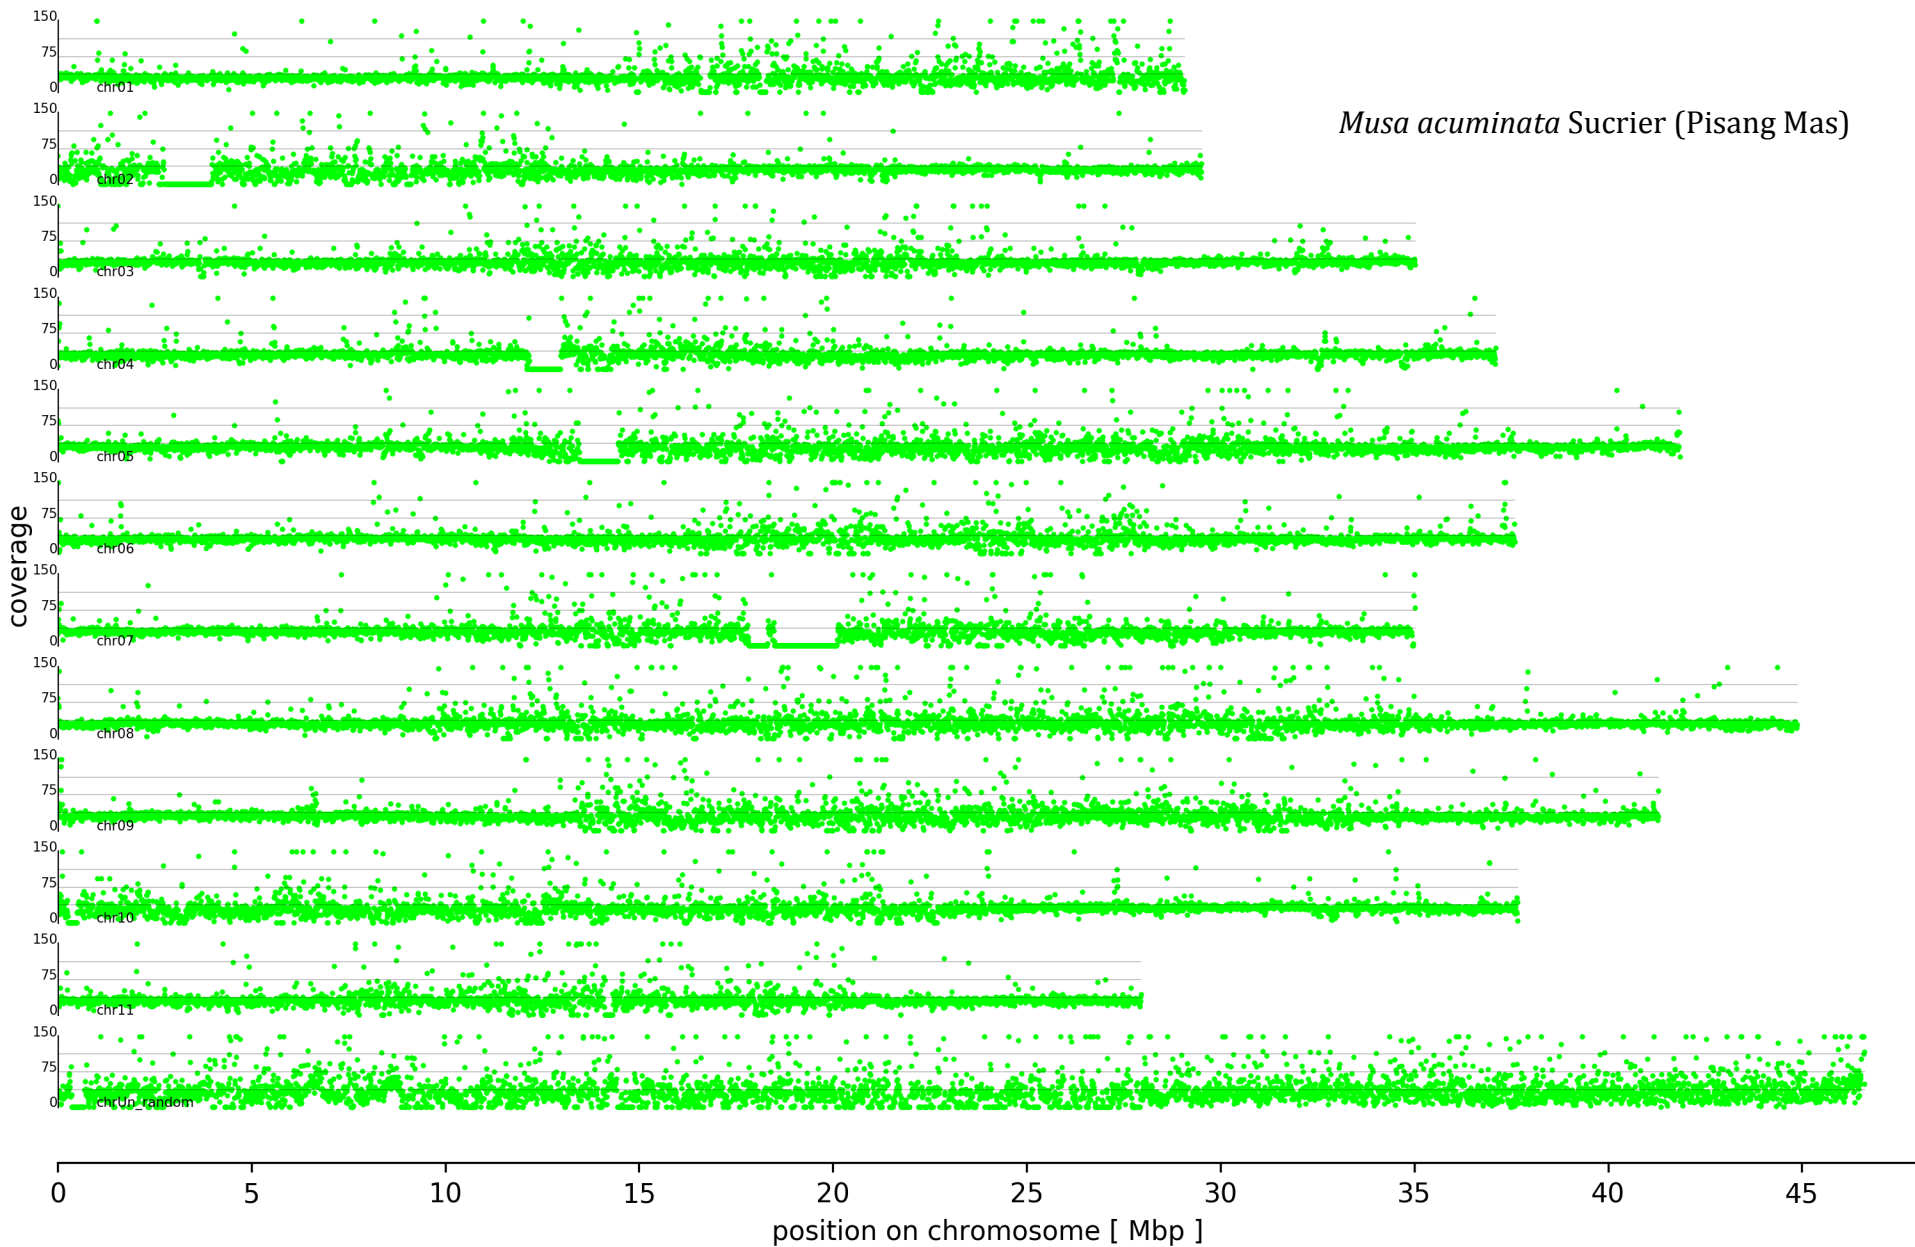

*Musa acuminata* Sucrier (Pisang Mas  
1998-2307)

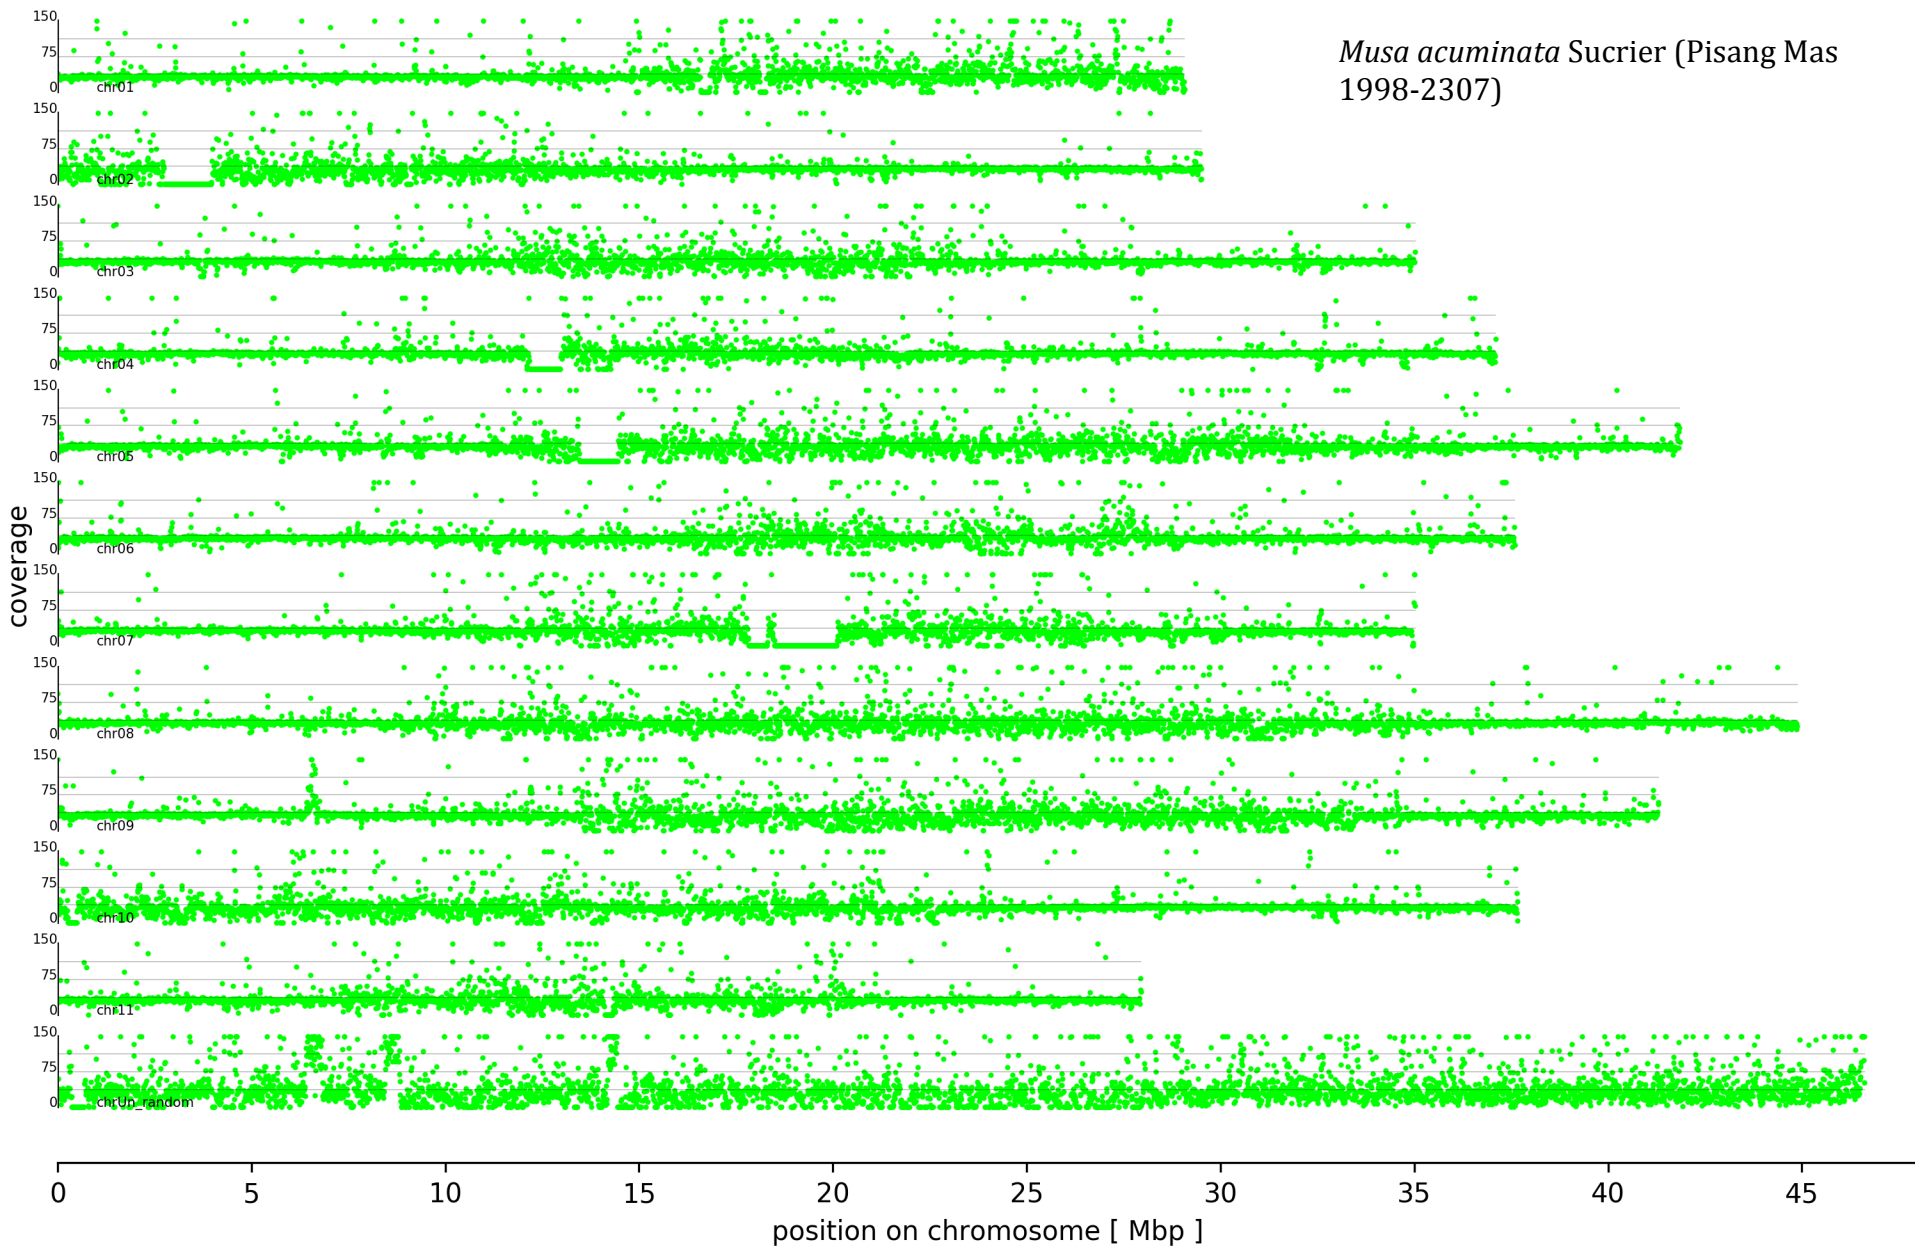

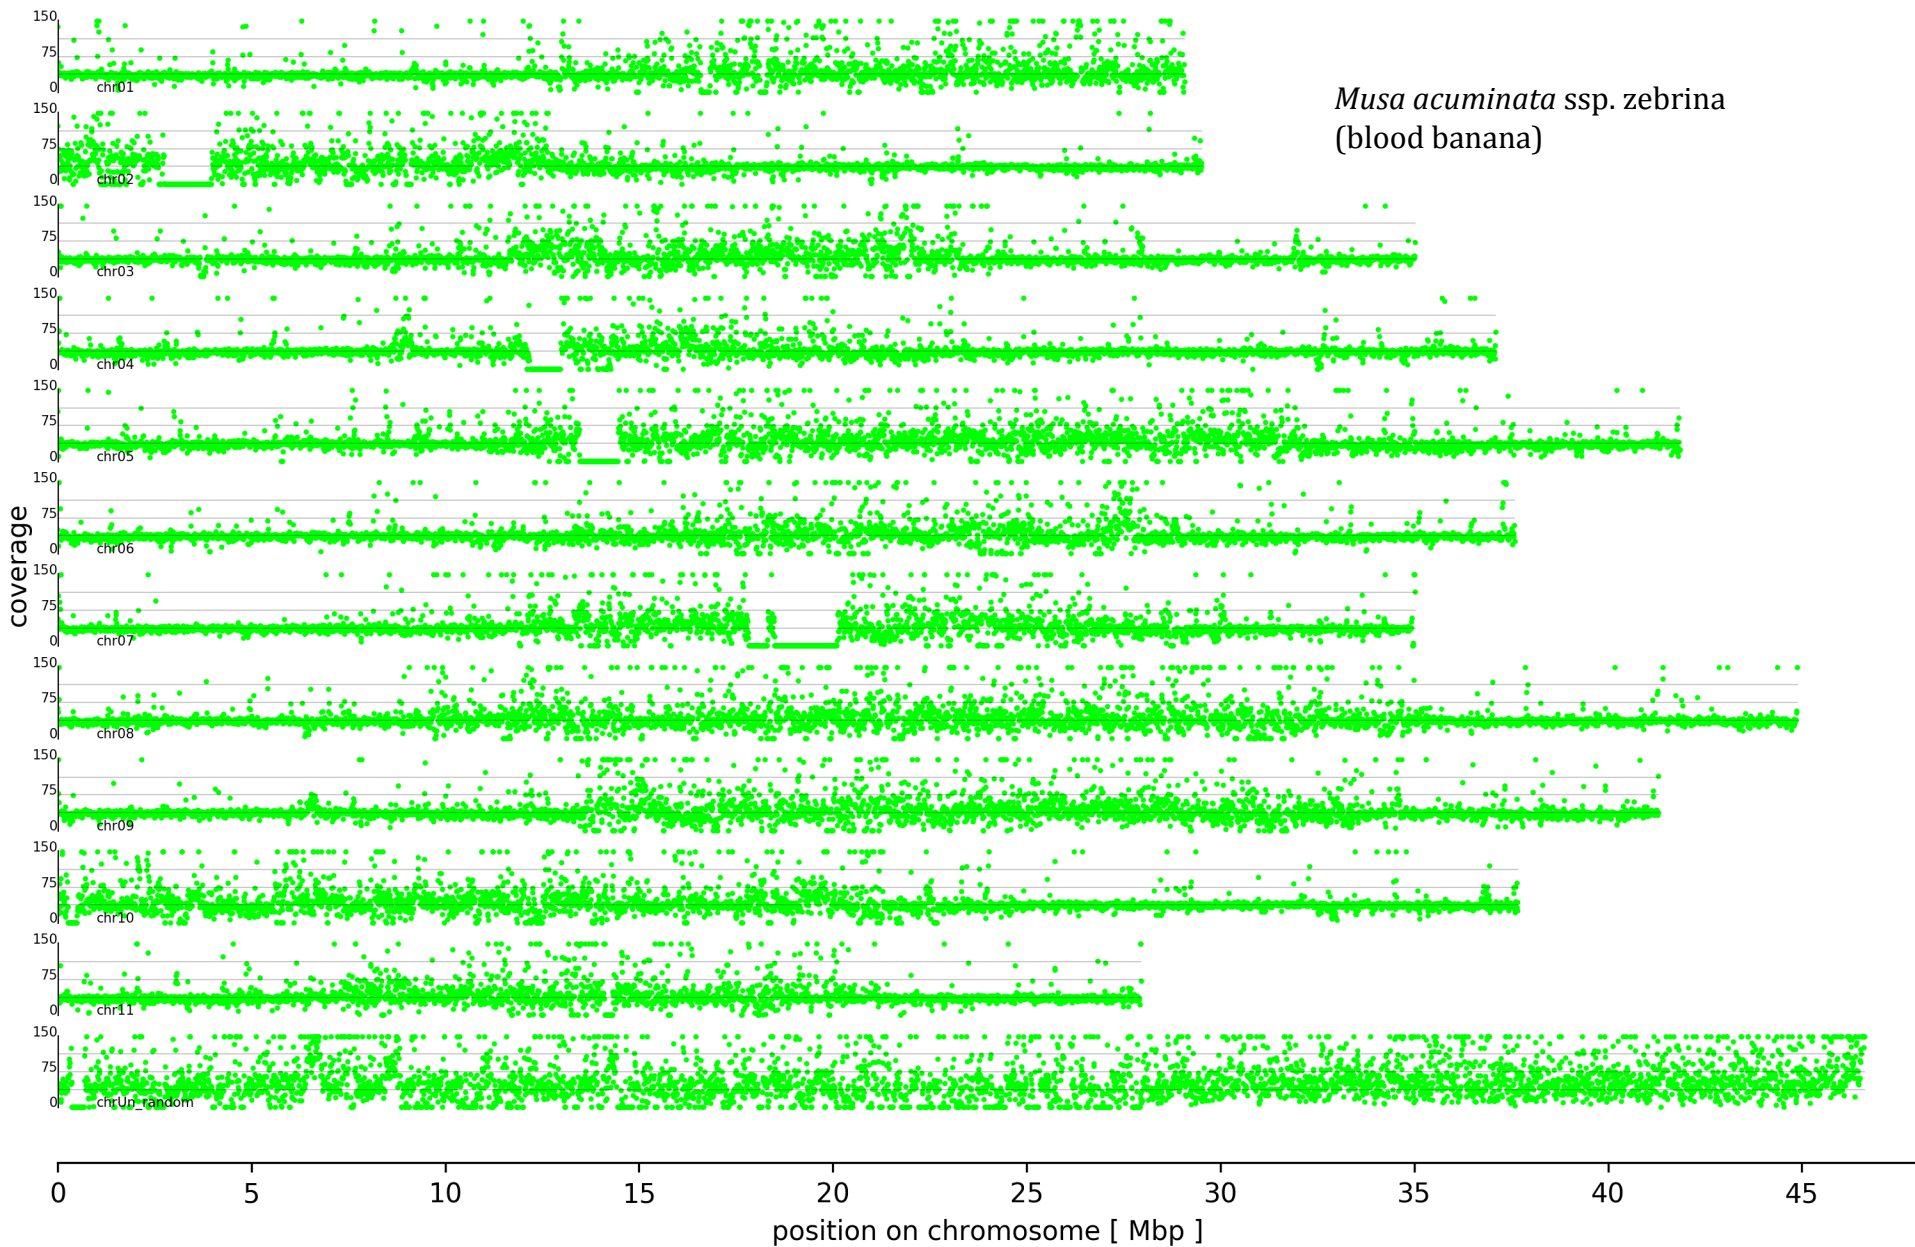

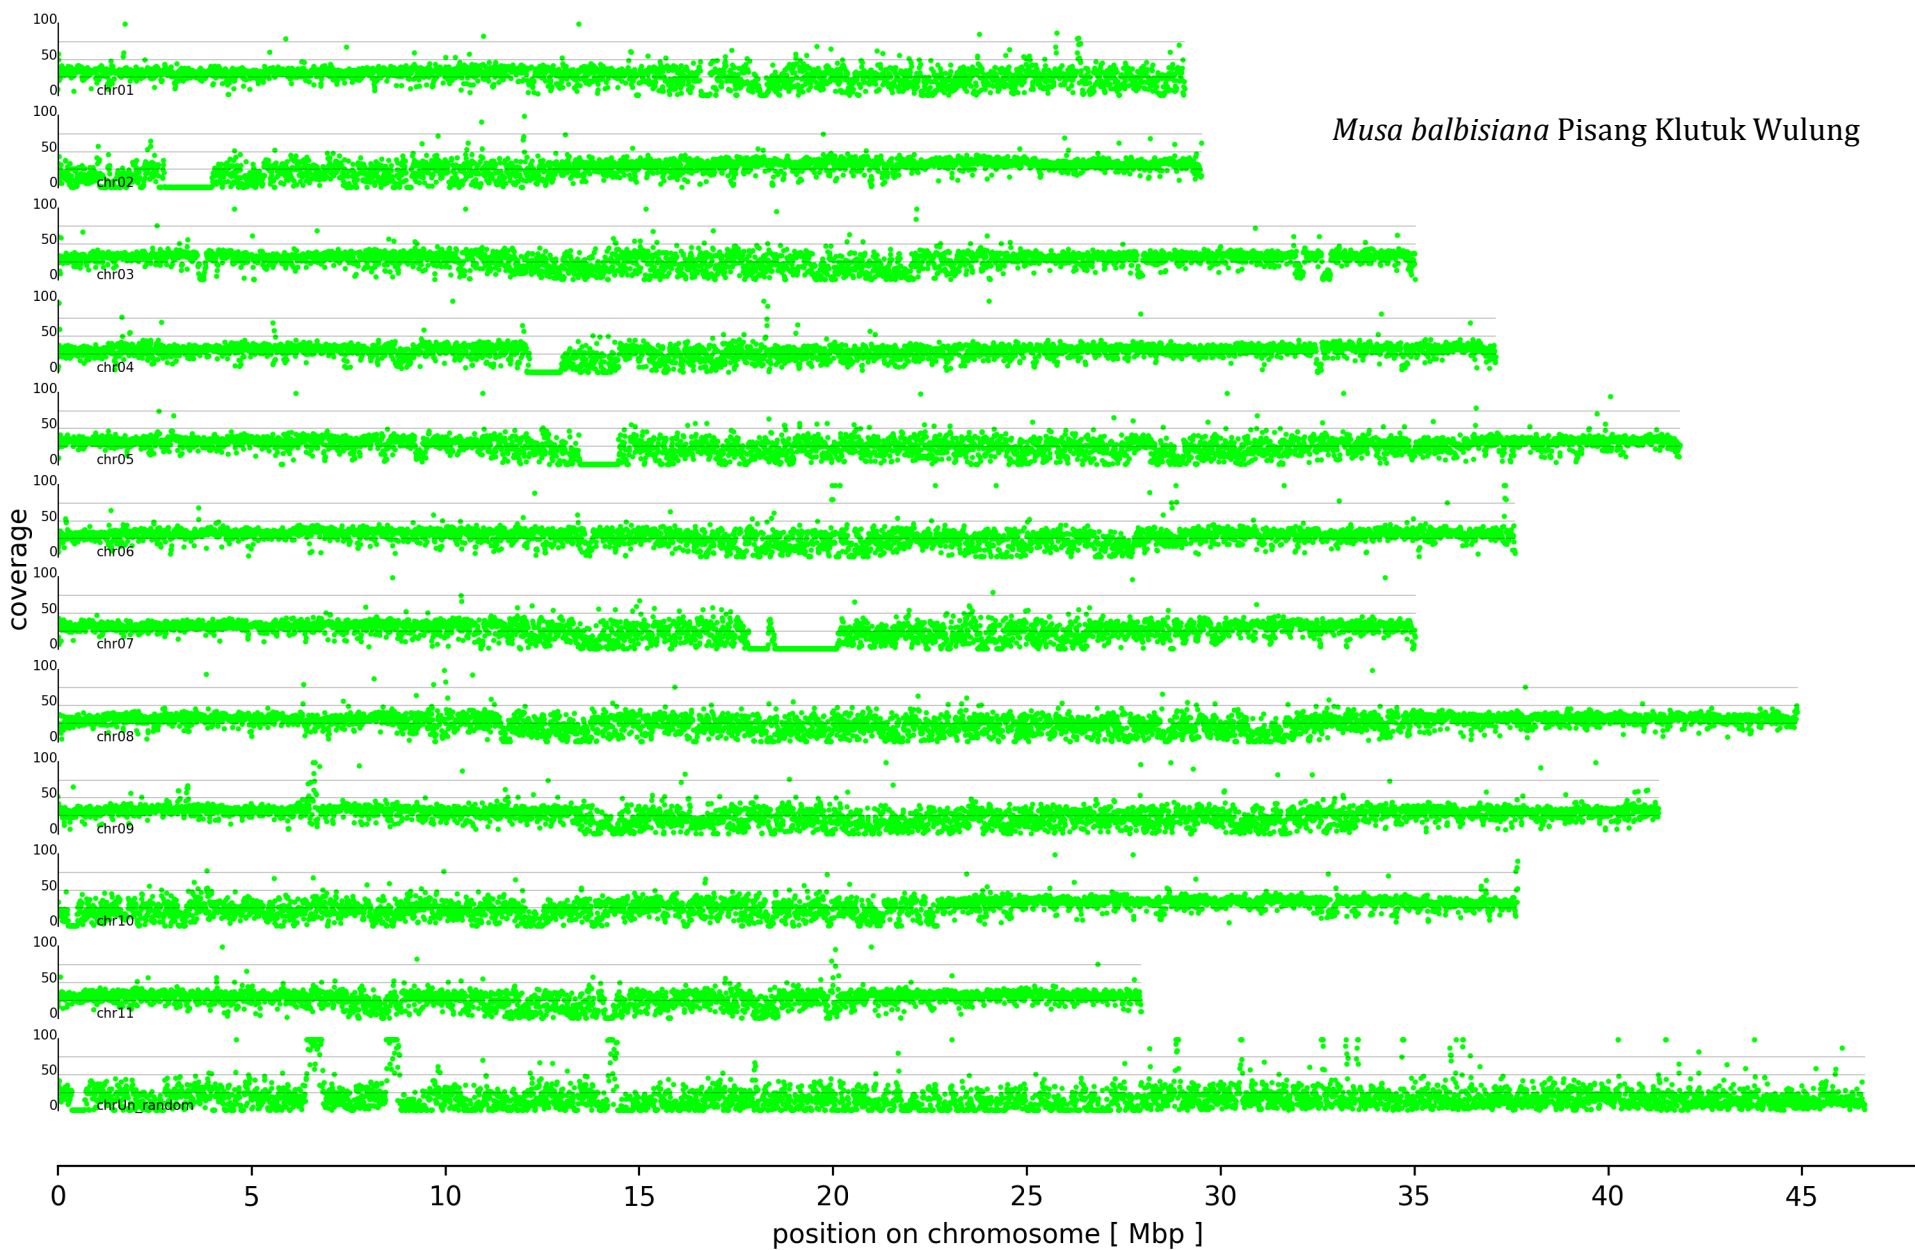

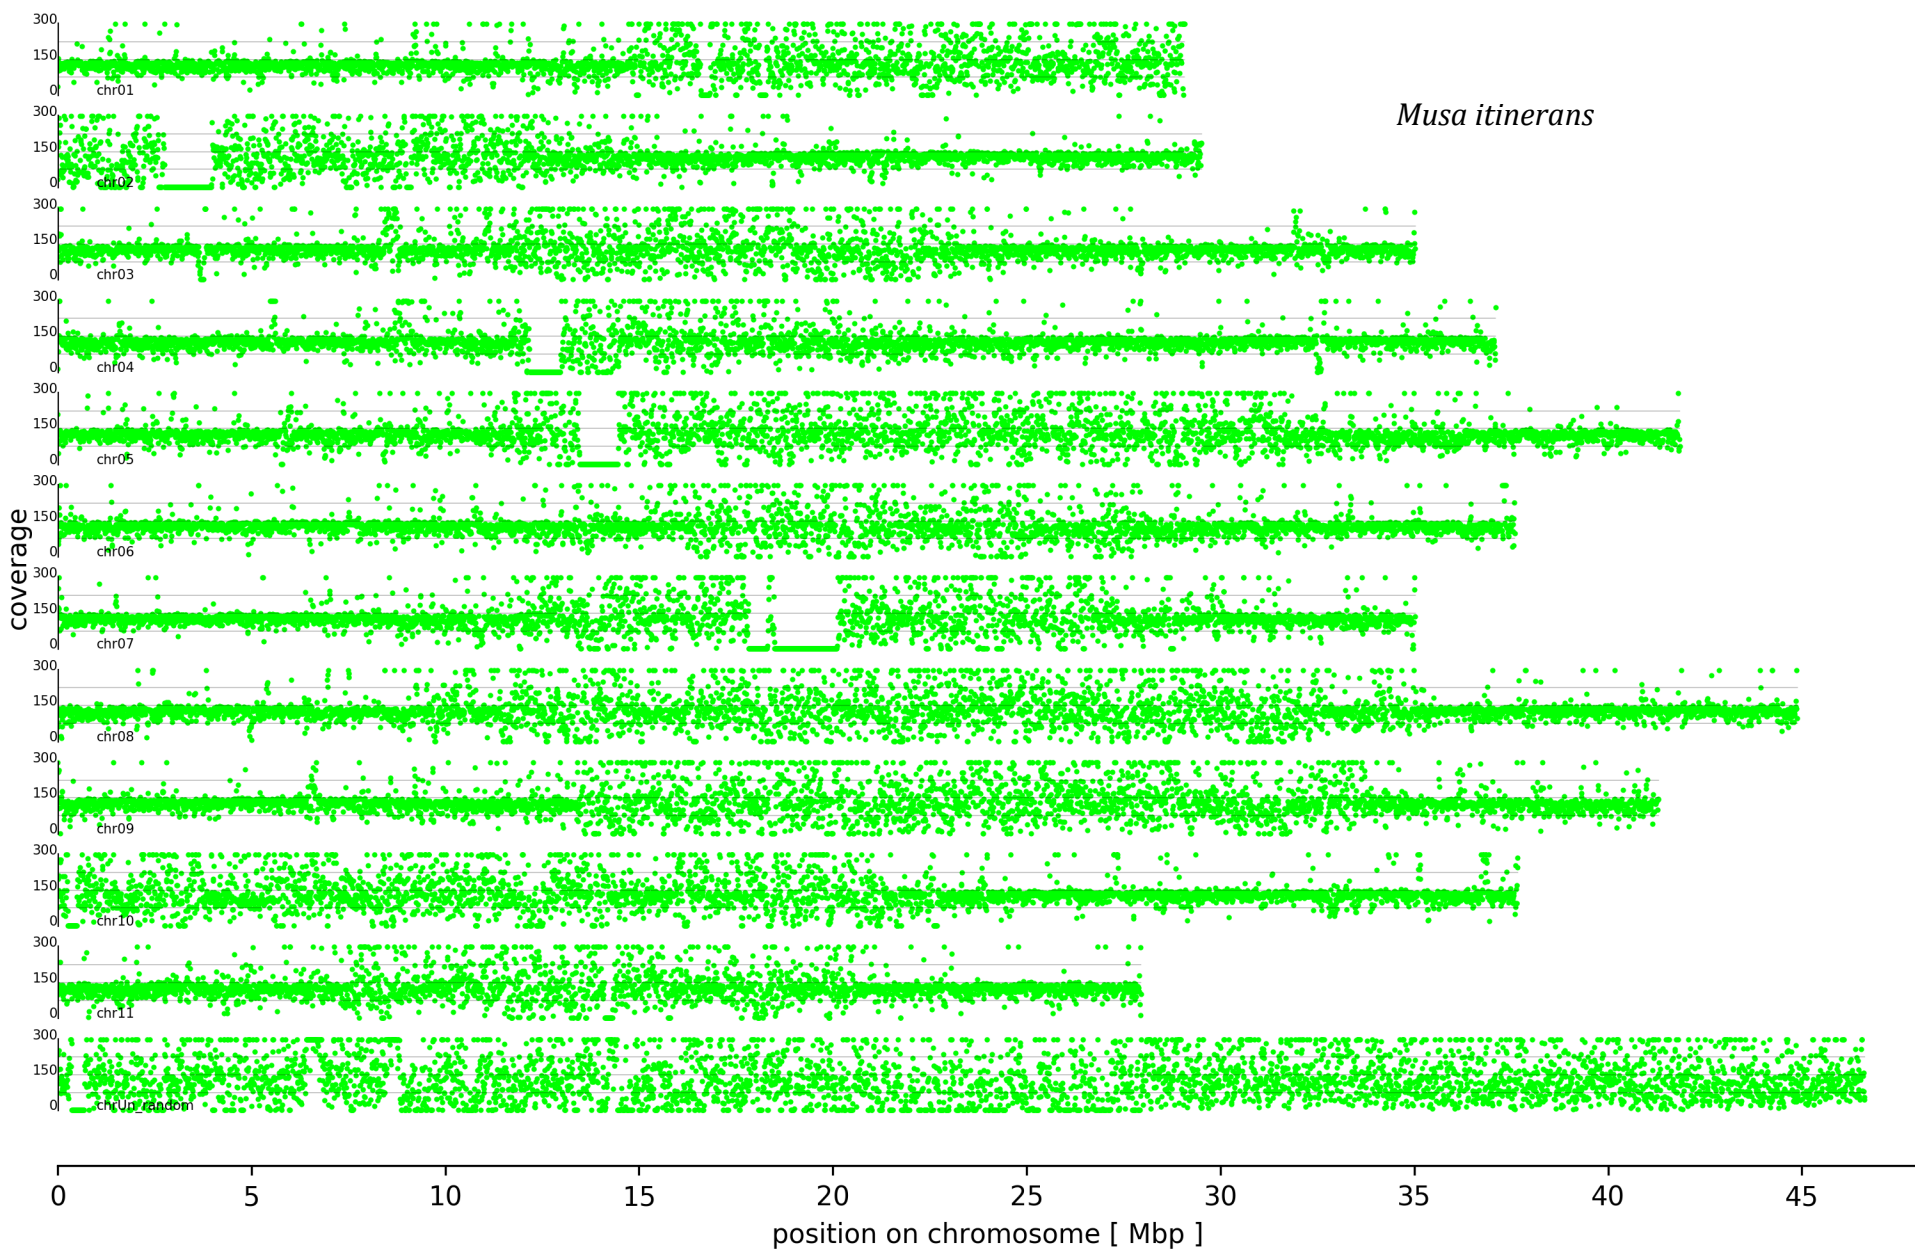

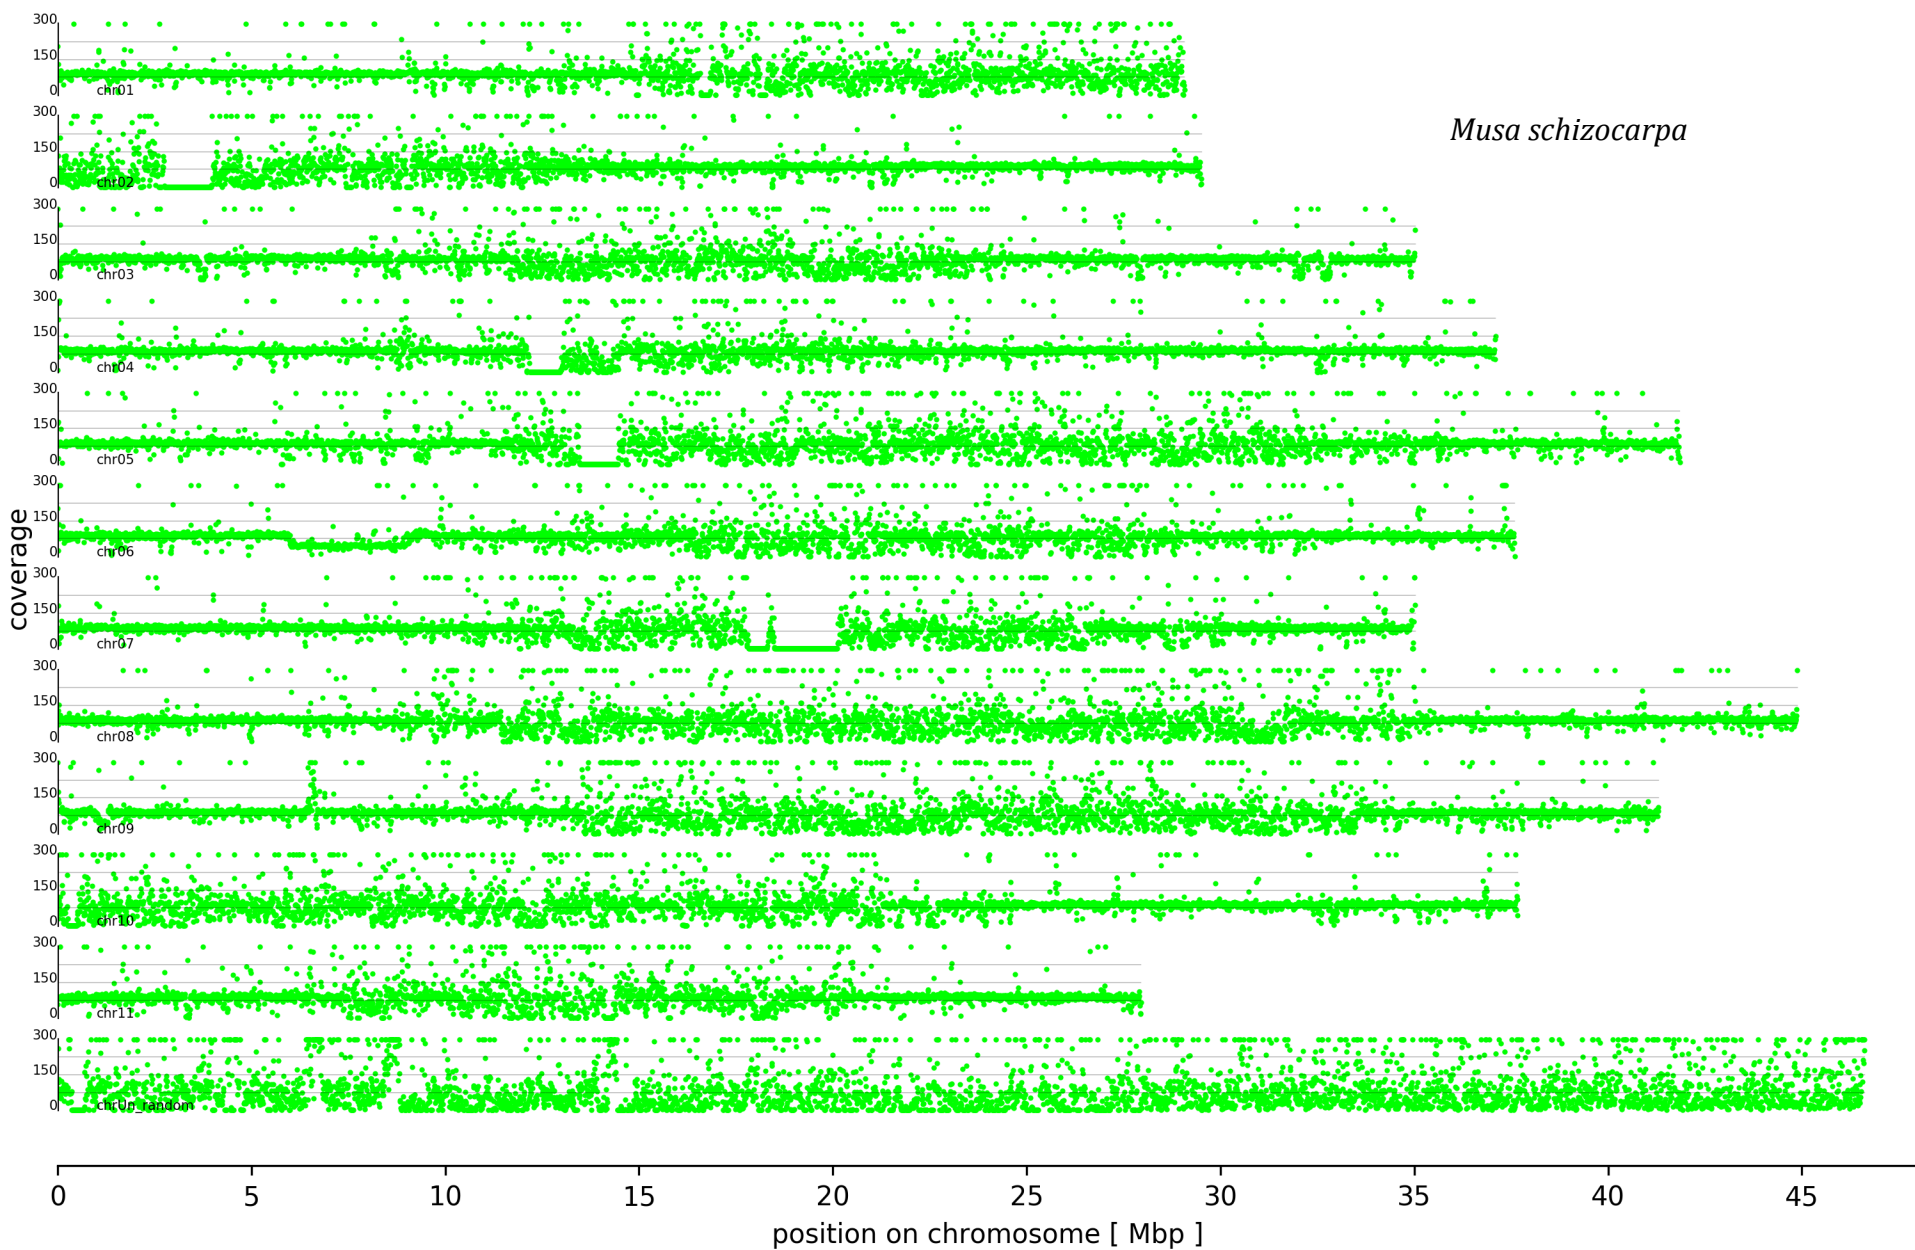

Supplement: Supplementary file [file 2]
