# Supplementary material
Source: publisher figshare collection journal article supplement (https://gsajournals.figshare.com/articles/dataset/_/9994643)

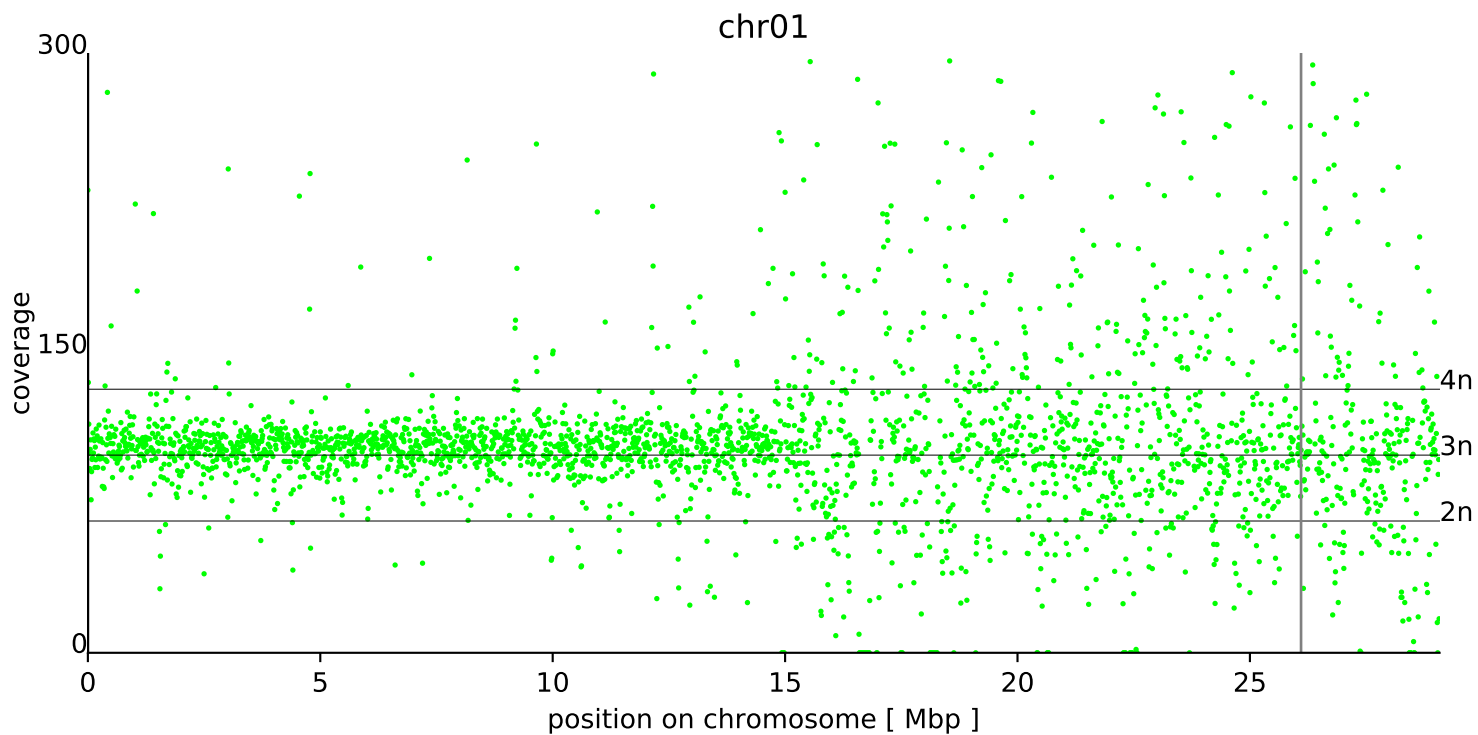

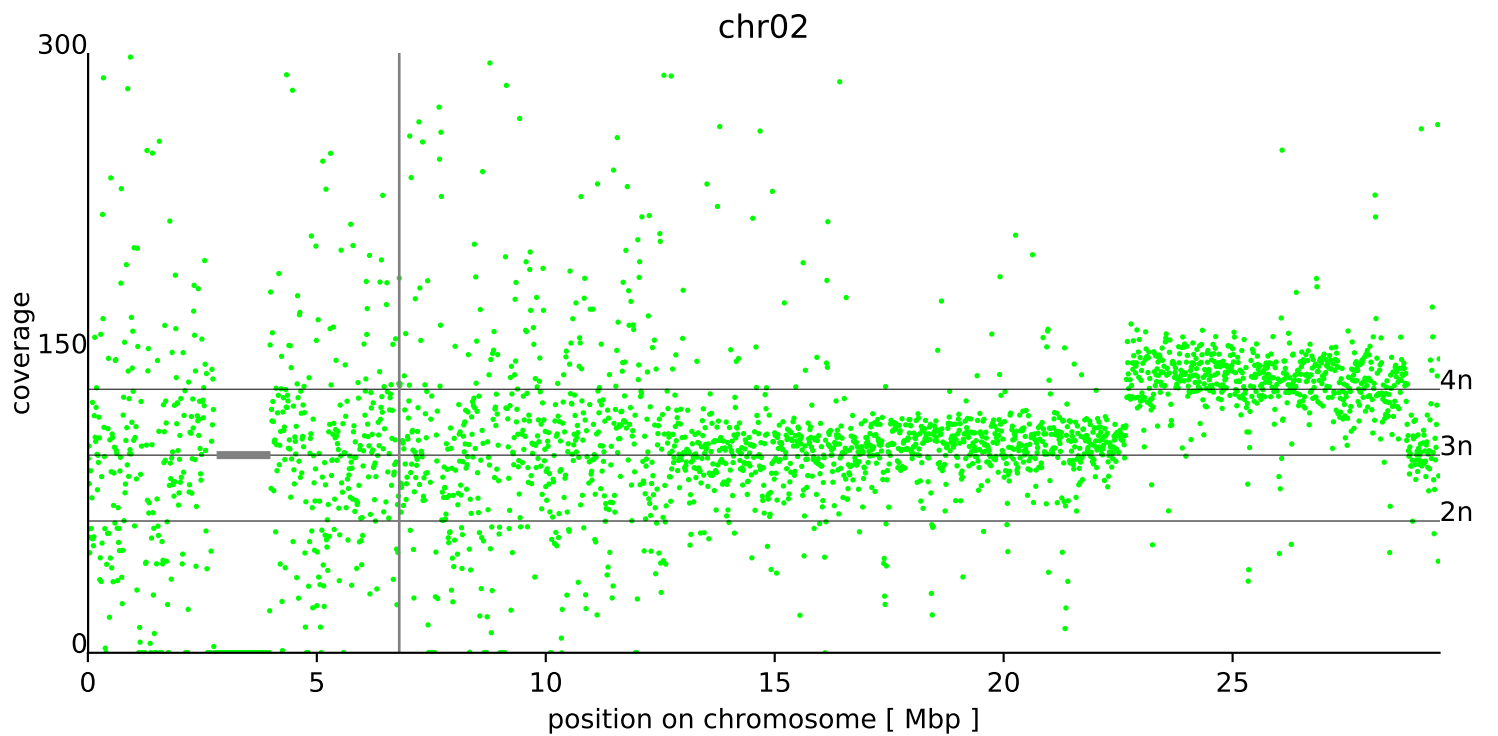

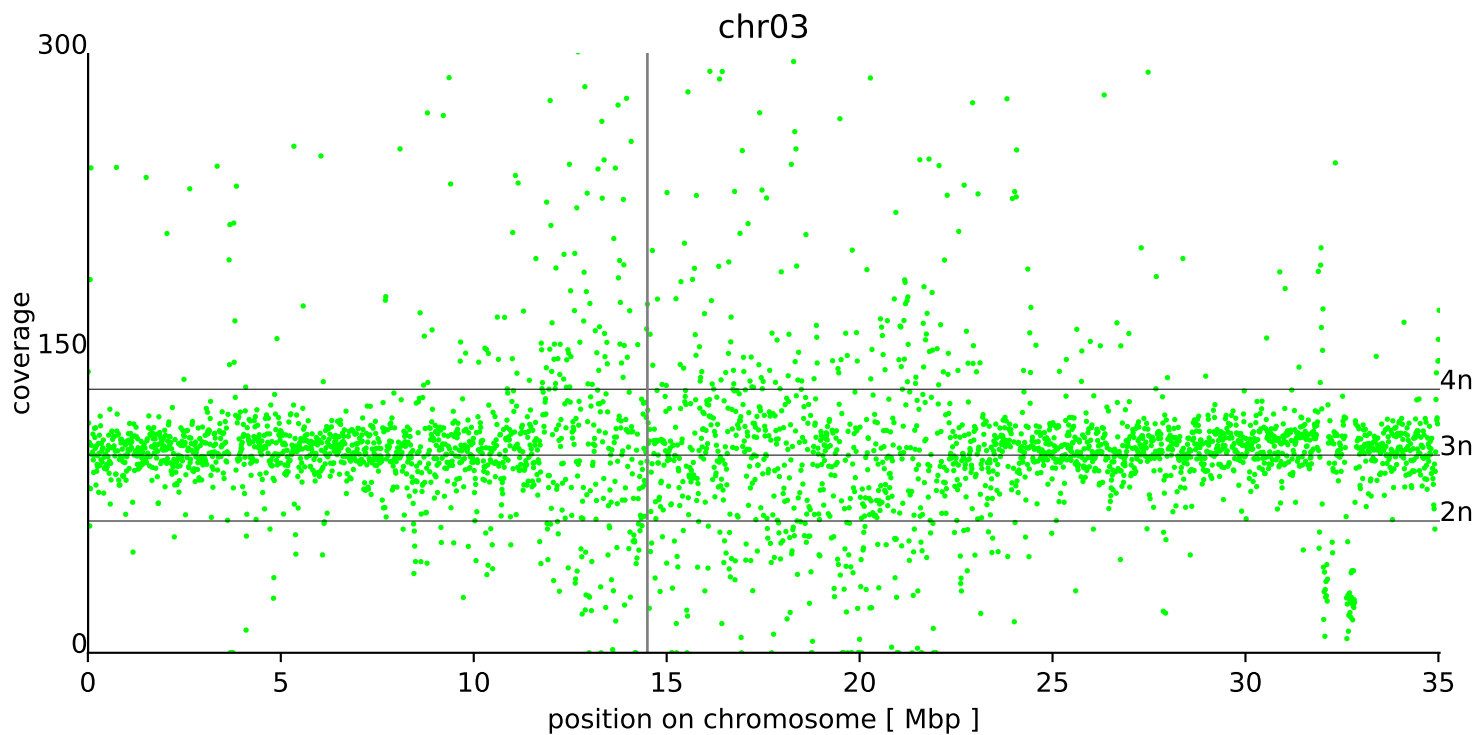

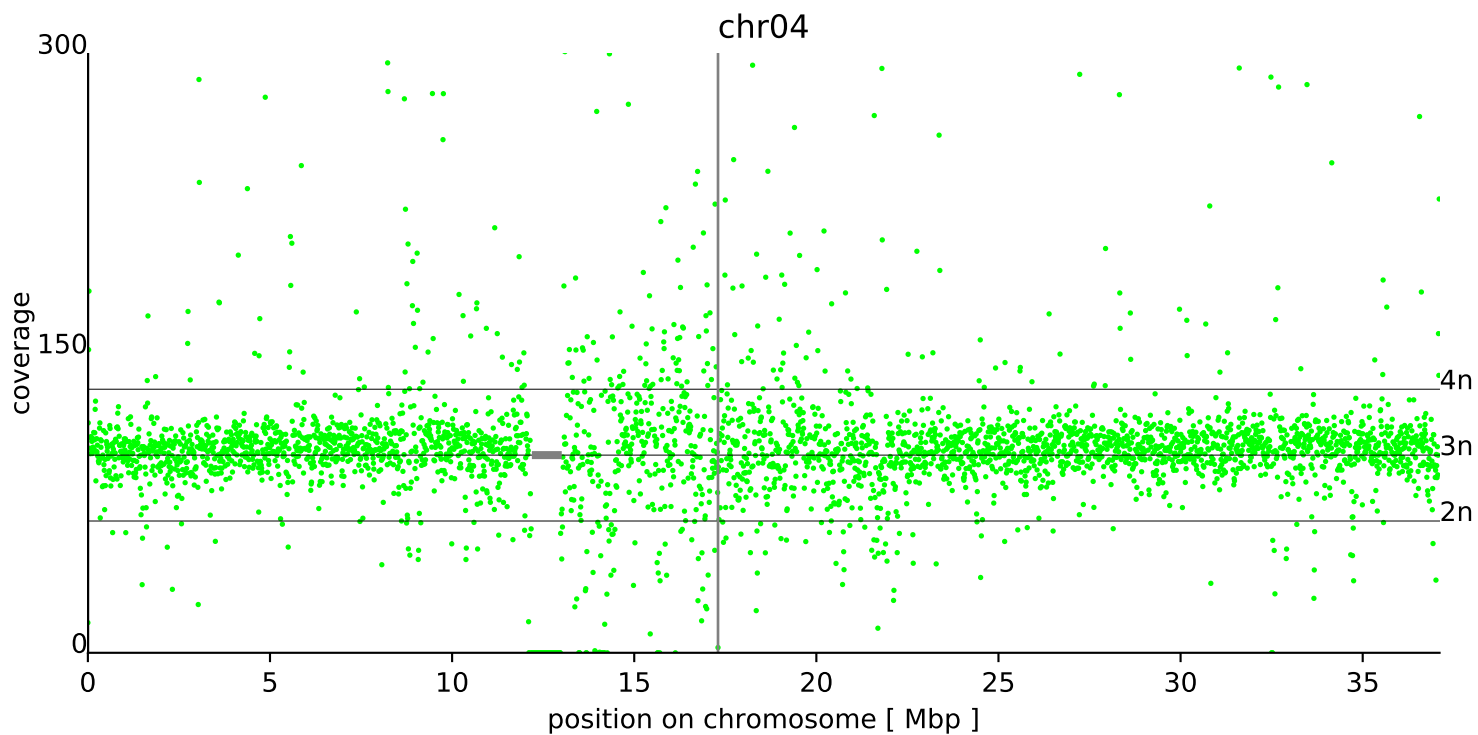

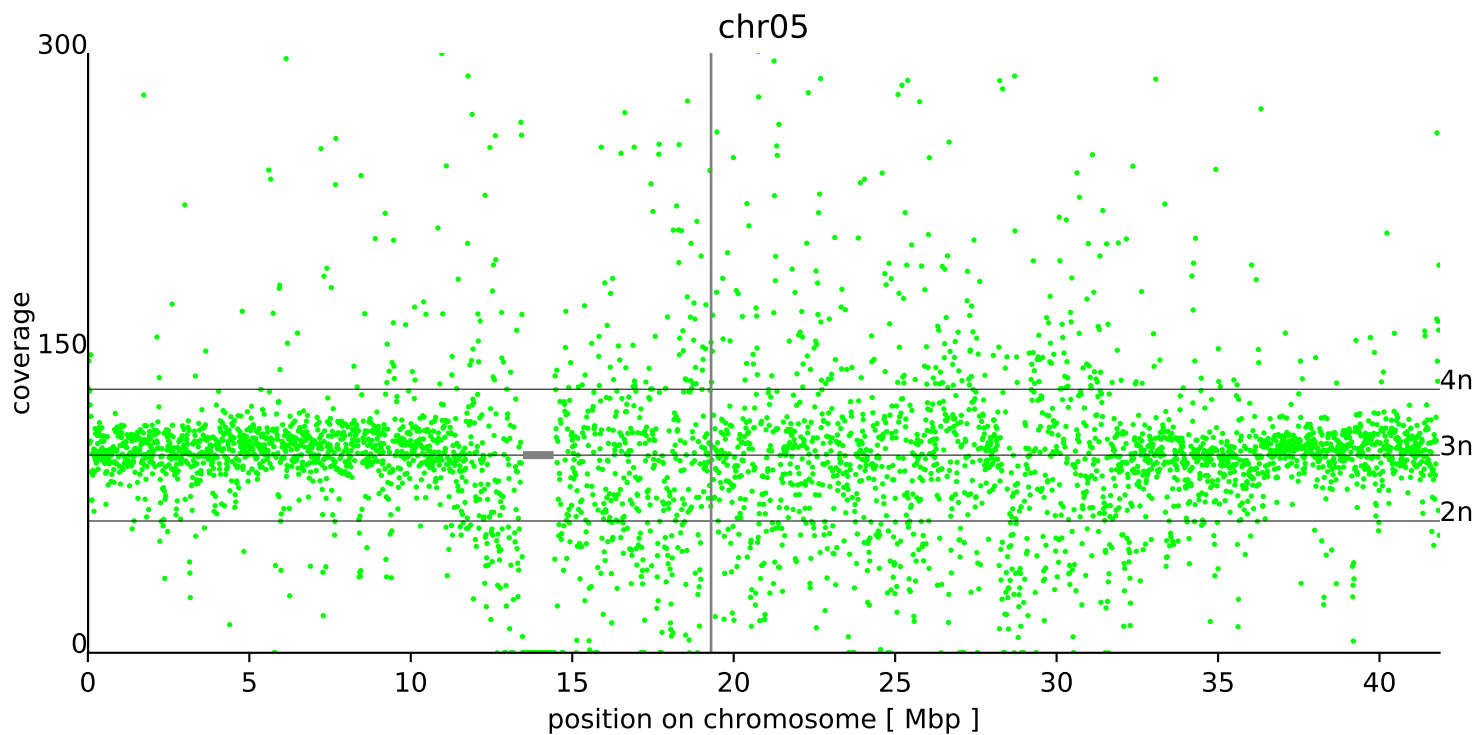

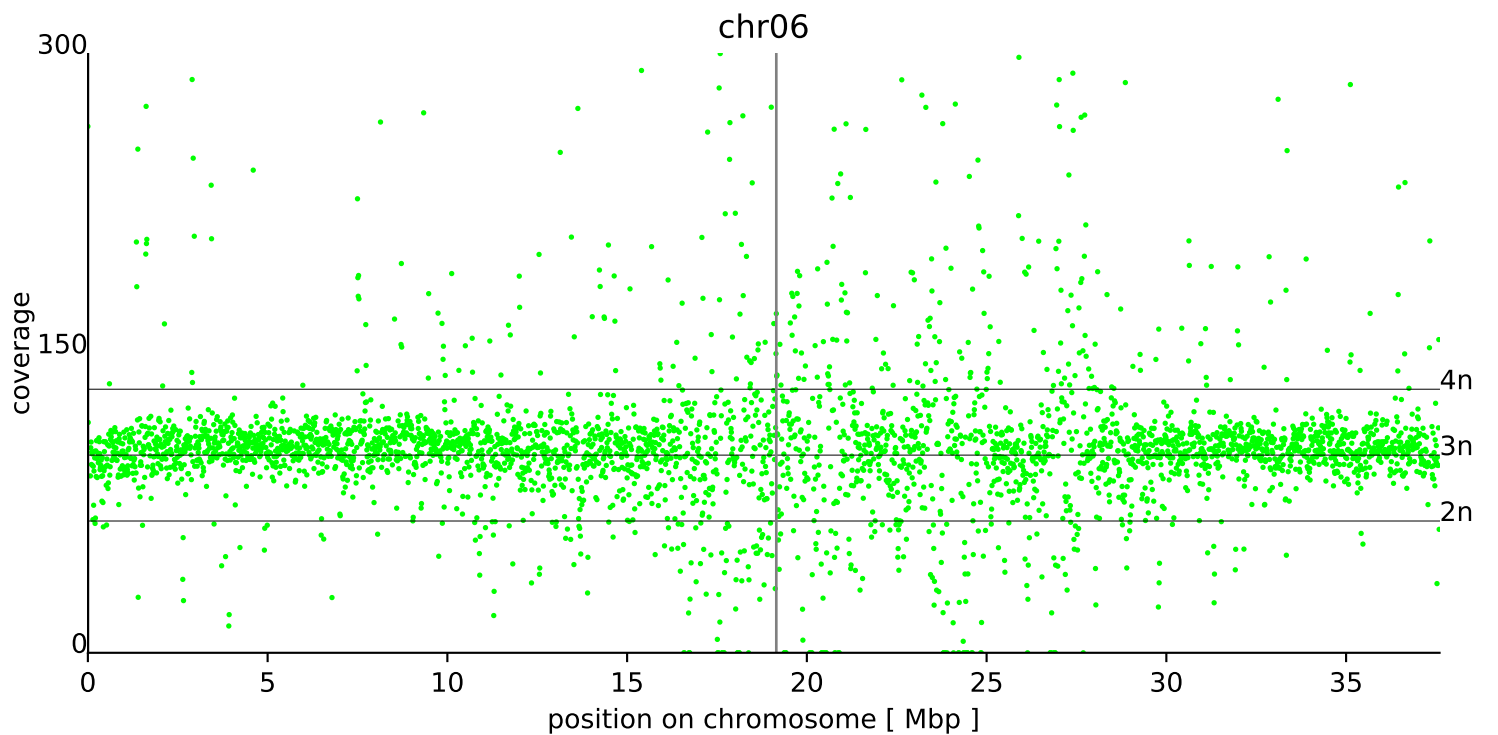

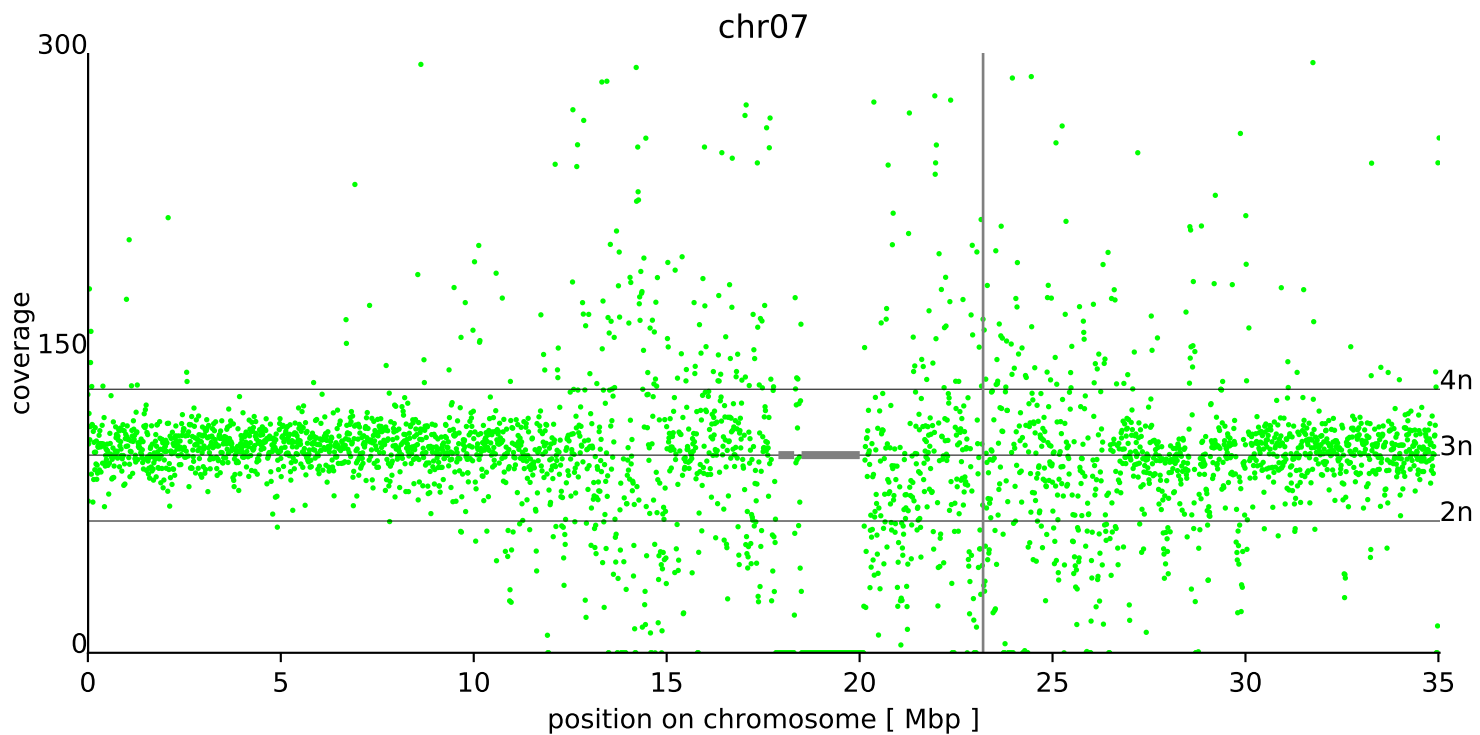

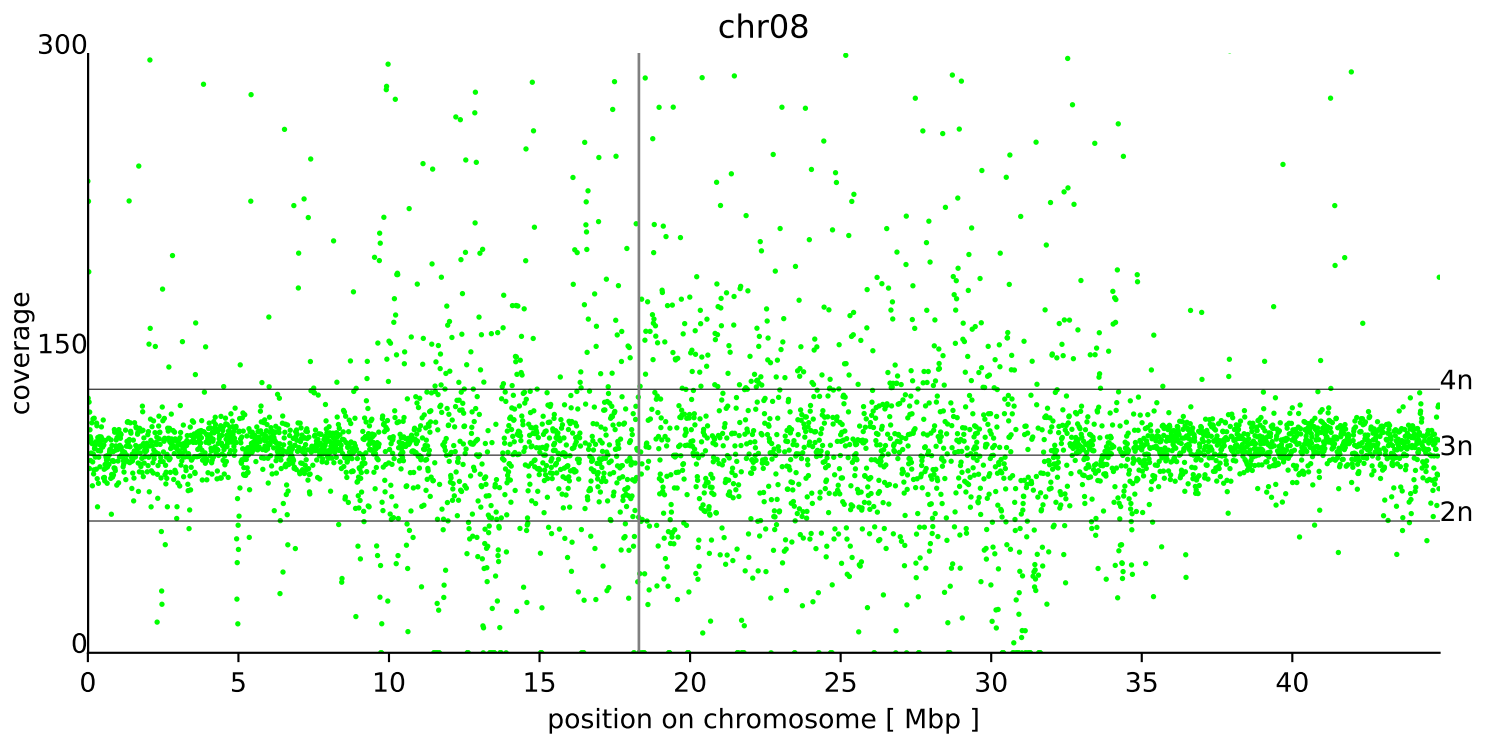



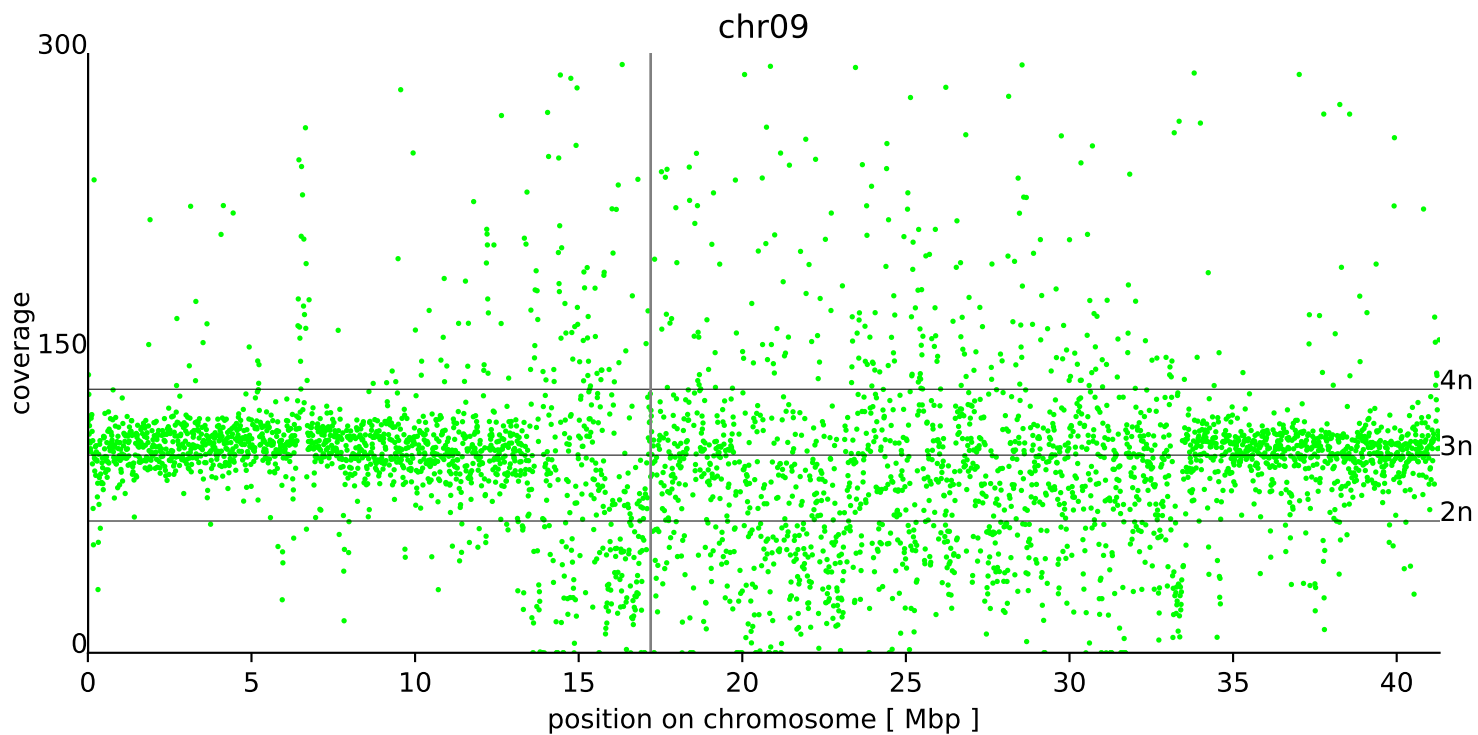

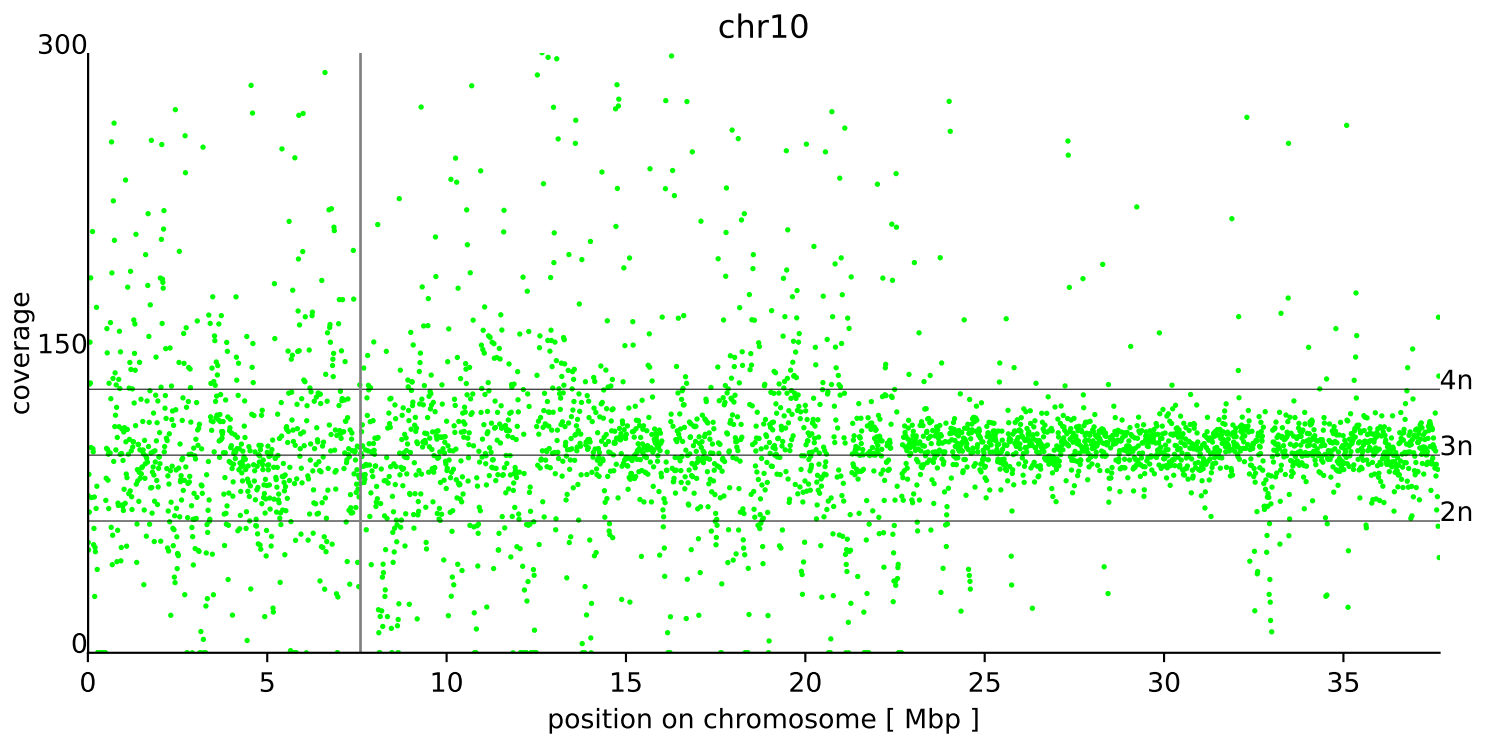

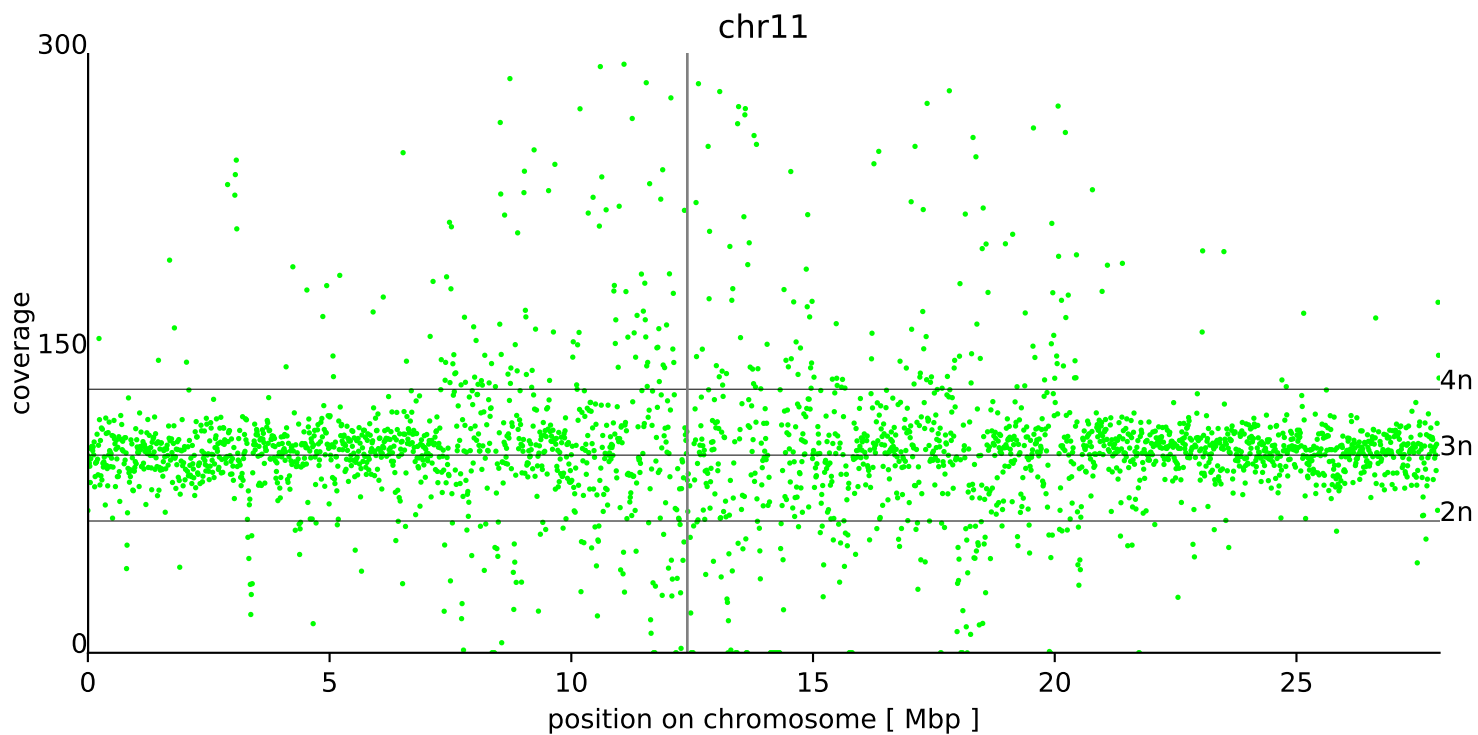

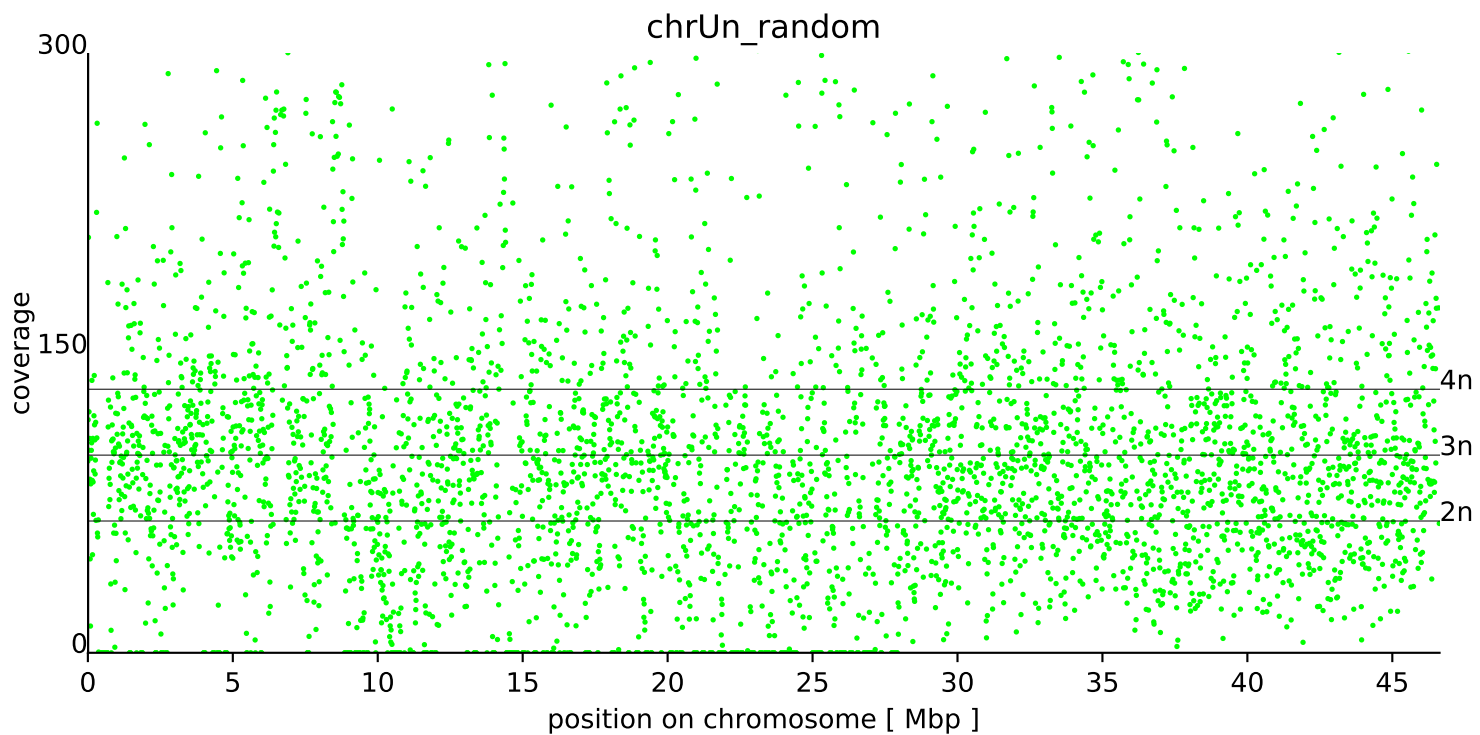

Supplement: Supplementary file [file 2]
